# Supplementary material
Source: PubMed Central journal article supplement (PMC5299120)
Supplement: CVI.00457-16_zcd999095444s1.pdf [file CVI.00457-16_zcd999095444s1.pdf]

**Supplementary Table S1. Test sera OIs.** The consensus and the laboratory-specific GMOIs for the unadjusted and normalized results are shown for each serum tested in this study. Results identified as outliers are indicated in red. Outliers were included in the determination of the consensus values in this table, but are excluded in other indicated analyses.

| Serotype | Sample  | Unadjusted   |                          |       |       |       |       |       | Normalized   |                          |       |       |       |       |       |
|----------|---------|--------------|--------------------------|-------|-------|-------|-------|-------|--------------|--------------------------|-------|-------|-------|-------|-------|
|          |         | Consensus OI | Laboratory-Specific GMOI |       |       |       |       |       | Consensus OI | Laboratory-Specific GMOI |       |       |       |       |       |
|          |         |              | Lab A                    | Lab B | Lab C | Lab D | Lab E | Lab F |              | Lab A                    | Lab B | Lab C | Lab D | Lab E | Lab F |
| Pn 1     | FDA007A | 311          | 199                      | 353   | 195   | 400   | 789   | 209   | 309          | 366                      | 301   | 315   | 291   | 361   | 238   |
|          | FDA007B | 272          | 128                      | 431   | 150   | 446   | 503   | 221   | 264          | 212                      | 366   | 234   | 325   | 230   | 251   |
|          | FDA007C | 266          | 142                      | 265   | 125   | 366   | 688   | 300   | 251          | 231                      | 225   | 214   | 267   | 315   | 270   |
|          | FDA007D | 434          | 240                      | 799   | 246   | 1020  | 546   | 255   | 412          | 389                      | 680   | 424   | 743   | 250   | 235   |
|          | FDA007E | 72           | 4                        | 41    | 25    | 208   | 556   | 285   | 65           | 4                        | 35    | 42    | 133   | 254   | 384   |
|          | FDA007F | 77           | 48                       | 54    | 44    | 88    | 297   | 68    | 79           | 87                       | 50    | 76    | 56    | 136   | 92    |
|          | FDA007G | 1709         | 1532                     | 2031  | 1205  | 1735  | 3668  | 1044  | 1777         | 2786                     | 1903  | 2079  | 1387  | 1680  | 1225  |
|          | FDA007H | 123          | 65                       | 169   | 64    | 298   | 242   | 66    | 128          | 119                      | 158   | 111   | 238   | 111   | 79    |
|          | FDA007I | 117          | 52                       | 160   | 64    | 158   | 359   | 85    | 118          | 79                       | 149   | 109   | 126   | 165   | 103   |
|          | FDA007J | 110          | 63                       | 122   | 78    | 126   | 281   | 83    | 111          | 103                      | 114   | 134   | 92    | 129   | 101   |
|          | FDA007K | 234          | 147                      | 224   | 189   | 241   | 679   | 163   | 247          | 241                      | 250   | 325   | 176   | 311   | 214   |
|          | FDA007L | 141          | 79                       | 123   | 99    | 135   | 607   | 99    | 146          | 128                      | 137   | 158   | 98    | 278   | 130   |
|          | FDA007M | 9            | 4                        | 4     | 4     | 26    | 103   | 6     | 8            | 4                        | 4     | 4     | 18    | 47    | 6     |
|          | FDA007N | 148          | 65                       | 168   | 65    | 186   | 508   | 157   | 157          | 115                      | 187   | 105   | 135   | 233   | 202   |
|          | FDA007O | 592          | 409                      | 836   | 369   | 948   | 1032  | 347   | 618          | 653                      | 934   | 595   | 689   | 473   | 470   |
|          | FDA007P | 270          | 188                      | 347   | 187   | 454   | 408   | 170   | 275          | 300                      | 332   | 309   | 329   | 187   | 230   |
|          | S21     | 4            | 4                        | 4     | 4     | 5     | 4     | 4     | 4            | 4                        | 4     | 4     | 5     | 4     | 4     |
| S22      | 5       | 4            | 8                        | 4     | 4     | 4     | 4     | 5     | 4            | 8                        | 4     | 4     | 4     | 4     |       |
| S23      | 14      | 26           | 6                        | 27    | 35    | 4     | 13    | 15    | 43           | 5                        | 43    | 23    | 4     | 14    |       |
| S24      | 6       | 4            | 9                        | 4     | 26    | 4     | 4     | 6     | 4            | 9                        | 4     | 19    | 4     | 4     |       |
| Pn 3     | FDA007A | 69           | 33                       | 109   | 41    | 141   | 212   | 26    | 64           | 37                       | 59    | 48    | 67    | 269   | 37    |
|          | FDA007B | 66           | 28                       | 208   | 29    | 124   | 208   | 19    | 61           | 31                       | 113   | 34    | 59    | 264   | 28    |
|          | FDA007C | 30           | 24                       | 60    | 22    | 49    | 24    | 19    | 29           | 29                       | 33    | 27    | 23    | 29    | 31    |
|          | FDA007D | 190          | 87                       | 428   | 102   | 427   | 364   | 81    | 184          | 105                      | 233   | 127   | 204   | 463   | 131   |
|          | FDA007E | 94           | 76                       | 312   | 130   | 412   | 42    | 12    | 86           | 91                       | 170   | 162   | 168   | 53    | 15    |
|          | FDA007F | 38           | 29                       | 62    | 26    | 75    | 32    | 27    | 35           | 36                       | 33    | 33    | 30    | 40    | 40    |
|          | FDA007G | 313          | 298                      | 523   | 206   | 490   | 302   | 197   | 309          | 368                      | 279   | 258   | 253   | 384   | 340   |
|          | FDA007H | 48           | 27                       | 91    | 27    | 113   | 71    | 23    | 47           | 34                       | 49    | 31    | 58    | 90    | 39    |
|          | FDA007I | 32           | 16                       | 69    | 18    | 90    | 53    | 11    | 29           | 18                       | 37    | 20    | 46    | 67    | 15    |
|          | FDA007J | 12           | 8                        | 10    | 4     | 41    | 51    | 4     | 10           | 10                       | 5     | 4     | 18    | 65    | 4     |
|          | FDA007K | 44           | 27                       | 86    | 24    | 99    | 56    | 26    | 39           | 29                       | 37    | 27    | 43    | 71    | 42    |
|          | FDA007L | 58           | 44                       | 109   | 59    | 123   | 41    | 28    | 54           | 61                       | 47    | 69    | 53    | 52    | 46    |
|          | FDA007M | 96           | 46                       | 297   | 50    | 201   | 104   | 55    | 87           | 58                       | 129   | 58    | 88    | 132   | 86    |
|          | FDA007N | 305          | 267                      | 552   | 212   | 665   | 226   | 172   | 281          | 371                      | 239   | 248   | 290   | 287   | 270   |
|          | FDA007O | 134          | 97                       | 258   | 70    | 233   | 190   | 76    | 123          | 118                      | 112   | 81    | 109   | 242   | 124   |
|          | FDA007P | 196          | 150                      | 492   | 217   | 447   | 90    | 89    | 189          | 186                      | 272   | 264   | 209   | 114   | 145   |
|          | S21     | 4            | 4                        | 4     | 4     | 4     | 4     | 4     | 4            | 4                        | 4     | 4     | 4     | 4     | 4     |
| S22      | 4       | 4            | 6                        | 4     | 4     | 4     | 4     | 4     | 4            | 5                        | 4     | 4     | 4     | 4     |       |
| S23      | 5       | 4            | 5                        | 4     | 8     | 4     | 4     | 4     | 4            | 4                        | 4     | 5     | 4     | 4     |       |
| S24      | 4       | 4            | 4                        | 4     | 4     | 4     | 4     | 4     | 4            | 4                        | 4     | 4     | 4     | 4     |       |

Pn, pneumococcal serotype; OI, opsonic index; GMOI, geometric mean opsonic index

**Supplementary Table S1 (continued). Test sera OIs.** The consensus and the laboratory-specific OIs for the unadjusted and normalized results are shown for each serum tested in this study. Results identified as outliers are indicated in red. Outliers were included in the determination of the consensus values in this table, but are excluded in other indicated analyses.

| Serotype | Sample  | Unadjusted   |                          |       |       |       |       |       | Normalized   |                          |       |       |       |       |       |
|----------|---------|--------------|--------------------------|-------|-------|-------|-------|-------|--------------|--------------------------|-------|-------|-------|-------|-------|
|          |         | Consensus OI | Laboratory-Specific GMOI |       |       |       |       |       | Consensus OI | Laboratory-Specific GMOI |       |       |       |       |       |
|          |         |              | Lab A                    | Lab B | Lab C | Lab D | Lab E | Lab F |              | Lab A                    | Lab B | Lab C | Lab D | Lab E | Lab F |
| Pn 4     | FDA007A | 5158         | 2176                     | 15743 | 4290  | 4643  | 5722  | 4821  | 5371         | 3651                     | 6390  | 5988  | 4790  | 6494  | 5604  |
|          | FDA007B | 1542         | 831                      | 4195  | 1196  | 1395  | 1586  | 1460  | 1617         | 1395                     | 1703  | 1669  | 1439  | 1910  | 1697  |
|          | FDA007C | 3849         | 1766                     | 9503  | 3415  | 2913  | 7286  | 2671  | 3890         | 2639                     | 3857  | 4767  | 3005  | 7754  | 3124  |
|          | FDA007D | 10516        | 5359                     | 31260 | 8267  | 9812  | 8743  | 11381 | 10815        | 8010                     | 12688 | 11540 | 10122 | 9897  | 13478 |
|          | FDA007E | 3955         | 1238                     | 13933 | 3182  | 3362  | 3643  | 5638  | 4118         | 2218                     | 5655  | 4442  | 3168  | 4285  | 6317  |
|          | FDA007F | 396          | 262                      | 1276  | 242   | 280   | 382   | 447   | 430          | 483                      | 583   | 340   | 264   | 488   | 526   |
|          | FDA007G | 1822         | 1385                     | 3748  | 1654  | 1881  | 2180  | 1039  | 1949         | 2552                     | 1712  | 2328  | 1741  | 2535  | 1230  |
|          | FDA007H | 1350         | 855                      | 3186  | 1089  | 1317  | 1261  | 1229  | 1462         | 1575                     | 1455  | 1533  | 1219  | 1606  | 1445  |
|          | FDA007I | 610          | 434                      | 1333  | 541   | 729   | 425   | 531   | 653          | 757                      | 609   | 762   | 675   | 572   | 562   |
|          | FDA007J | 1189         | 684                      | 3467  | 792   | 1257  | 1088  | 1098  | 1205         | 1192                     | 1584  | 1114  | 950   | 1347  | 1131  |
|          | FDA007K | 820          | 719                      | 1611  | 729   | 1167  | 654   | 471   | 799          | 1254                     | 749   | 828   | 882   | 759   | 499   |
|          | FDA007L | 1440         | 580                      | 3584  | 1151  | 1404  | 1769  | 1500  | 1459         | 1180                     | 1665  | 1307  | 1061  | 2189  | 1673  |
|          | FDA007M | 2873         | 1931                     | 6932  | 1899  | 2064  | 3496  | 3012  | 2760         | 2906                     | 3220  | 2156  | 1561  | 4379  | 3304  |
|          | FDA007N | 4163         | 2006                     | 8837  | 4444  | 3958  | 6169  | 2707  | 4257         | 4083                     | 4105  | 5046  | 2993  | 7616  | 3154  |
|          | FDA007O | 7735         | 4519                     | 19939 | 6759  | 7665  | 7651  | 5995  | 8088         | 8585                     | 9261  | 7675  | 7736  | 8573  | 6995  |
|          | FDA007P | 2970         | 1614                     | 8412  | 2240  | 2994  | 3214  | 2347  | 3023         | 3066                     | 2545  | 3332  | 3021  | 3505  | 2939  |
|          | S17     | 84           | 79                       | 343   | 132   | 150   | 4     | 161   | 77           | 118                      | 104   | 197   | 142   | 4     | 157   |
| S18      | 96      | 119          | 401                      | 222   | 187   | 4     | 95    | 89    | 178          | 121                      | 331   | 177   | 4     | 95    |       |
| S19      | 60      | 59           | 338                      | 88    | 73    | 4     | 88    | 58    | 89           | 102                      | 131   | 69    | 4     | 110   |       |
| S20      | 85      | 100          | 379                      | 157   | 188   | 4     | 85    | 86    | 167          | 115                      | 233   | 194   | 4     | 112   |       |
| Pn 5     | FDA007A | 489          | 230                      | 1150  | 459   | 839   | 402   | 335   | 475          | 263                      | 625   | 458   | 615   | 566   | 445   |
|          | FDA007B | 329          | 156                      | 639   | 338   | 366   | 358   | 285   | 324          | 178                      | 347   | 337   | 268   | 562   | 379   |
|          | FDA007C | 364          | 304                      | 803   | 449   | 469   | 179   | 253   | 345          | 351                      | 436   | 415   | 344   | 262   | 288   |
|          | FDA007D | 1513         | 785                      | 3087  | 1891  | 1739  | 1370  | 1101  | 1458         | 906                      | 1676  | 1747  | 1276  | 2004  | 1432  |
|          | FDA007E | 153          | 186                      | 317   | 229   | 221   | 61    | 70    | 145          | 215                      | 172   | 212   | 146   | 77    | 105   |
|          | FDA007F | 223          | 165                      | 305   | 195   | 328   | 151   | 251   | 221          | 196                      | 197   | 180   | 217   | 199   | 380   |
|          | FDA007G | 298          | 234                      | 297   | 314   | 377   | 282   | 302   | 305          | 278                      | 191   | 290   | 275   | 402   | 475   |
|          | FDA007H | 337          | 462                      | 1035  | 457   | 407   | 101   | 163   | 351          | 549                      | 667   | 479   | 297   | 140   | 256   |
|          | FDA007I | 95           | 53                       | 185   | 132   | 134   | 58    | 75    | 93           | 53                       | 120   | 138   | 98    | 67    | 109   |
|          | FDA007J | 10           | 4                        | 8     | 17    | 18    | 5     | 17    | 10           | 4                        | 7     | 18    | 13    | 5     | 25    |
|          | FDA007K | 2265         | 2299                     | 8379  | 2171  | 3437  | 811   | 1159  | 2343         | 2335                     | 5974  | 2280  | 2586  | 1130  | 1771  |
|          | FDA007L | 72           | 43                       | 164   | 123   | 103   | 54    | 28    | 74           | 45                       | 117   | 135   | 78    | 66    | 43    |
|          | FDA007M | 144          | 63                       | 394   | 183   | 209   | 129   | 71    | 155          | 76                       | 281   | 200   | 157   | 187   | 113   |
|          | FDA007N | 2279         | 2054                     | 5841  | 2295  | 3111  | 1307  | 1251  | 2447         | 2454                     | 4164  | 2507  | 2341  | 1783  | 1992  |
|          | FDA007O | 118          | 53                       | 208   | 235   | 122   | 222   | 40    | 123          | 57                       | 148   | 256   | 87    | 281   | 65    |
|          | FDA007P | 498          | 311                      | 1112  | 653   | 742   | 391   | 233   | 525          | 327                      | 820   | 689   | 531   | 554   | 384   |
|          | S21     | 5            | 4                        | 4     | 4     | 9     | 4     | 4     | 4            | 4                        | 4     | 4     | 4     | 6     | 4     |
| S22      | 4       | 4            | 4                        | 4     | 4     | 4     | 4     | 4     | 4            | 4                        | 4     | 4     | 4     | 4     |       |
| S23      | 4       | 4            | 4                        | 4     | 4     | 4     | 4     | 4     | 4            | 4                        | 4     | 4     | 4     | 4     |       |
| S24      | 4       | 4            | 4                        | 4     | 4     | 4     | 4     | 4     | 4            | 4                        | 4     | 4     | 4     | 4     |       |

Pn, pneumococcal serotype; OI, opsonic index; GMOI, geometric mean opsonic index

**Supplementary Table S1 (continued). Test sera OIs.** The consensus and the laboratory-specific OIs for the unadjusted and normalized results are shown for each serum tested in this study. Results identified as outliers are indicated in red. Outliers were included in the determination of the consensus values in this table, but are excluded in other indicated analyses.

| Serotype | Sample  | Unadjusted   |                          |       |       |       |       |       | Normalized   |                          |       |       |       |       |       |
|----------|---------|--------------|--------------------------|-------|-------|-------|-------|-------|--------------|--------------------------|-------|-------|-------|-------|-------|
|          |         | Consensus OI | Laboratory-Specific GMOI |       |       |       |       |       | Consensus OI | Laboratory-Specific GMOI |       |       |       |       |       |
|          |         |              | Lab A                    | Lab B | Lab C | Lab D | Lab E | Lab F |              | Lab A                    | Lab B | Lab C | Lab D | Lab E | Lab F |
| Pn 6A    | FDA007A | 1316         | 1356                     | 2510  | 624   | 1775  | 1284  | 1073  | 1270         | 1268                     | 1776  | 1045  | 1474  | 1711  | 712   |
|          | FDA007B | 1104         | 862                      | 2482  | 697   | 1314  | 698   | 1327  | 1069         | 806                      | 1756  | 1150  | 1091  | 949   | 881   |
|          | FDA007C | 795          | 930                      | 1424  | 467   | 1040  | 571   | 683   | 717          | 674                      | 1007  | 759   | 863   | 742   | 404   |
|          | FDA007D | 19973        | 27515                    | 36739 | 12627 | 14864 | 22365 | 14964 | 20197        | 19943                    | 25993 | 21260 | 20427 | 31910 | 9603  |
|          | FDA007E | 2906         | 3421                     | 6303  | 1436  | 2920  | 2078  | 3202  | 2803         | 2480                     | 4460  | 2418  | 2511  | 2634  | 2733  |
|          | FDA007F | 1534         | 1847                     | 3344  | 850   | 1306  | 1472  | 1293  | 1460         | 1447                     | 2068  | 1431  | 1123  | 1890  | 1081  |
|          | FDA007G | 2930         | 4679                     | 5683  | 2818  | 3239  | 1365  | 1911  | 2895         | 3667                     | 3515  | 4745  | 3589  | 1612  | 1641  |
|          | FDA007H | 1576         | 2239                     | 2956  | 1000  | 1049  | 1916  | 1154  | 1510         | 1755                     | 1829  | 1516  | 1162  | 2370  | 897   |
|          | FDA007I | 375          | 366                      | 693   | 323   | 307   | 344   | 322   | 390          | 433                      | 429   | 490   | 340   | 446   | 256   |
|          | FDA007J | 1400         | 1209                     | 2524  | 1262  | 1649  | 935   | 1267  | 1397         | 1430                     | 1561  | 1913  | 1458  | 1167  | 1006  |
|          | FDA007K | 362          | 307                      | 553   | 228   | 284   | 445   | 459   | 362          | 364                      | 456   | 354   | 251   | 435   | 359   |
|          | FDA007L | 126          | 258                      | 324   | 159   | 130   | 6     | 398   | 116          | 201                      | 268   | 256   | 115   | 5     | 311   |
|          | FDA007M | 2444         | 2651                     | 3042  | 1648  | 2793  | 1947  | 2949  | 2413         | 2064                     | 2509  | 2597  | 2471  | 2418  | 2459  |
|          | FDA007N | 619          | 684                      | 1212  | 631   | 689   | 223   | 704   | 623          | 533                      | 999   | 1005  | 609   | 265   | 668   |
|          | FDA007O | 1105         | 1279                     | 1648  | 771   | 724   | 1034  | 1498  | 1172         | 1088                     | 1359  | 1229  | 764   | 1314  | 1429  |
|          | FDA007P | 5047         | 8001                     | 9370  | 3325  | 4586  | 4160  | 3477  | 5171         | 6803                     | 6920  | 4890  | 4840  | 5175  | 3318  |
|          | S21     | 6            | 4                        | 37    | 4     | 5     | 4     | 4     | 6            | 4                        | 27    | 4     | 4     | 4     | 4     |
| S22      | 46      | 48           | 62                       | 35    | 36    | 102   | 27    | 48    | 47           | 46                       | 51    | 31    | 131   | 26    |       |
| S23      | 25      | 40           | 8                        | 48    | 40    | 10    | 37    | 26    | 41           | 7                        | 72    | 35    | 12    | 35    |       |
| S24      | 9       | 4            | 30                       | 4     | 10    | 4     | 33    | 8     | 4            | 22                       | 4     | 8     | 4     | 28    |       |
| Pn 6B    | FDA007A | 789          | 509                      | 1673  | 470   | 714   | 1216  | 692   | 763          | 618                      | 875   | 509   | 639   | 1655  | 712   |
|          | FDA007B | 861          | 603                      | 2103  | 602   | 903   | 737   | 803   | 831          | 732                      | 1100  | 651   | 808   | 963   | 826   |
|          | FDA007C | 2225         | 2196                     | 4933  | 1328  | 1822  | 2540  | 1823  | 2264         | 2953                     | 2580  | 1437  | 1631  | 3347  | 2289  |
|          | FDA007D | 13019        | 10081                    | 36171 | 8833  | 11410 | 13666 | 9694  | 13346        | 13554                    | 18921 | 9553  | 11410 | 16880 | 12174 |
|          | FDA007E | 3400         | 2707                     | 7763  | 2451  | 2917  | 3197  | 3216  | 3561         | 3640                     | 4061  | 2650  | 3032  | 3987  | 4350  |
|          | FDA007F | 1479         | 1172                     | 4022  | 942   | 1416  | 1610  | 1035  | 1646         | 2063                     | 2115  | 950   | 1471  | 2353  | 1401  |
|          | FDA007G | 5929         | 6602                     | 10122 | 8614  | 11099 | 1747  | 3893  | 6066         | 11623                    | 5323  | 8685  | 8857  | 2125  | 4894  |
|          | FDA007H | 1313         | 1169                     | 2706  | 783   | 1397  | 1178  | 1258  | 1368         | 2059                     | 1423  | 789   | 1115  | 1618  | 1581  |
|          | FDA007I | 423          | 333                      | 860   | 405   | 539   | 315   | 283   | 397          | 386                      | 453   | 408   | 430   | 389   | 326   |
|          | FDA007J | 2068         | 1316                     | 3754  | 2479  | 2537  | 1499  | 1680  | 1906         | 1523                     | 1974  | 2499  | 1862  | 1748  | 1935  |
|          | FDA007K | 651          | 663                      | 1360  | 665   | 757   | 405   | 414   | 610          | 767                      | 741   | 646   | 555   | 574   | 439   |
|          | FDA007L | 182          | 274                      | 427   | 347   | 421   | 7     | 280   | 155          | 443                      | 233   | 337   | 309   | 4     | 297   |
|          | FDA007M | 4247         | 2854                     | 9838  | 3664  | 6436  | 4148  | 2135  | 4186         | 4451                     | 5364  | 3559  | 4722  | 5915  | 2291  |
|          | FDA007N | 1974         | 1829                     | 3733  | 2920  | 2785  | 1066  | 1001  | 1923         | 2953                     | 2035  | 2836  | 2044  | 1337  | 1074  |
|          | FDA007O | 7497         | 5634                     | 15083 | 4446  | 4498  | 9108  | 11473 | 7438         | 8474                     | 8224  | 4318  | 4120  | 11972 | 11467 |
|          | FDA007P | 6680         | 5680                     | 15787 | 5798  | 6647  | 6138  | 4190  | 6527         | 8544                     | 7613  | 5827  | 6087  | 8075  | 4187  |
|          | S17     | 85           | 102                      | 343   | 132   | 153   | 4     | 134   | 77           | 113                      | 165   | 132   | 137   | 4     | 153   |
| S18      | 151     | 110          | 349                      | 155   | 142   | IR    | 92    | 141   | 157          | 168                      | 156   | 127   | IR    | 105   |       |
| S19      | 174     | 123          | 443                      | 178   | 211   | 96    | 137   | 183   | 176          | 214                      | 179   | 188   | 163   | 166   |       |
| S20      | 79      | 108          | 243                      | 152   | 147   | 4     | 100   | 74    | 132          | 117                      | 152   | 131   | 4     | 135   |       |

Pn, pneumococcal serotype; OI, opsonic index; GMOI, geometric mean opsonic index

**Supplementary Table S1 (continued). Test sera OIs.** The consensus and the laboratory-specific OIs for the unadjusted and normalized results are shown for each serum tested in this study. Results identified as outliers are indicated in red. Outliers were included in the determination of the consensus values in this table, but are excluded in other indicated analyses.

| Serotype | Sample  | Unadjusted   |                          |       |       |       |       |       | Normalized   |                          |       |       |       |       |       |
|----------|---------|--------------|--------------------------|-------|-------|-------|-------|-------|--------------|--------------------------|-------|-------|-------|-------|-------|
|          |         | Consensus OI | Laboratory-Specific GMOI |       |       |       |       |       | Consensus OI | Laboratory-Specific GMOI |       |       |       |       |       |
|          |         |              | Lab A                    | Lab B | Lab C | Lab D | Lab E | Lab F |              | Lab A                    | Lab B | Lab C | Lab D | Lab E | Lab F |
| Pn 7F    | FDA007A | 7210         | 6112                     | 30589 | 5029  | 10448 | 6811  | 2100  | 7066         | 6816                     | 15312 | 7573  | 7655  | 4213  | 4857  |
|          | FDA007B | 7977         | 6295                     | 31180 | 5932  | 10382 | 10579 | 2016  | 8157         | 7019                     | 15607 | 8932  | 8944  | 6754  | 4964  |
|          | FDA007C | 8464         | 8224                     | 16203 | 5873  | 10248 | 14468 | 3170  | 8422         | 8716                     | 8111  | 8748  | 8109  | 9195  | 7873  |
|          | FDA007D | 21335        | 15216                    | 33082 | 17430 | 24714 | 42089 | 10334 | 22290        | 17559                    | 16560 | 25964 | 30483 | 25921 | 20993 |
|          | FDA007E | 8781         | 7765                     | 30178 | 5032  | 10159 | 14568 | 2627  | 9105         | 8231                     | 15106 | 8683  | 8163  | 9194  | 7036  |
|          | FDA007F | 2698         | 2427                     | 7838  | 1331  | 2627  | 5955  | 974   | 2555         | 2302                     | 3562  | 1983  | 1833  | 3738  | 2559  |
|          | FDA007G | 10317        | 7011                     | 44663 | 7411  | 10535 | 16766 | 2943  | 10171        | 6648                     | 20297 | 12513 | 8441  | 10313 | 7534  |
|          | FDA007H | 2634         | 2173                     | 6647  | 2017  | 2732  | 4485  | 936   | 2550         | 2060                     | 3021  | 3103  | 2189  | 2758  | 2380  |
|          | FDA007I | 3876         | 3337                     | 12956 | 2281  | 4120  | 7585  | 1101  | 3757         | 3219                     | 5888  | 3510  | 3301  | 4882  | 2669  |
|          | FDA007J | 2056         | 1944                     | 6997  | 1574  | 2008  | 3465  | 507   | 1942         | 1875                     | 3180  | 2422  | 1439  | 2110  | 1228  |
|          | FDA007K | 904          | 1121                     | 2067  | 769   | 1237  | 1038  | 239   | 917          | 1081                     | 1147  | 1183  | 886   | 690   | 655   |
|          | FDA007L | 2619         | 2195                     | 5752  | 2356  | 3480  | 3944  | 790   | 2570         | 2130                     | 3190  | 3337  | 2495  | 2329  | 2162  |
|          | FDA007M | 5594         | 7271                     | 12912 | 4062  | 7543  | 8021  | 1333  | 5450         | 6447                     | 7162  | 5930  | 5407  | 5299  | 3415  |
|          | FDA007N | 6884         | 6285                     | 24348 | 4124  | 7028  | 8649  | 2775  | 6947         | 6098                     | 13506 | 6743  | 5038  | 5639  | 7046  |
|          | FDA007O | 3952         | 3148                     | 9995  | 3446  | 6014  | 5634  | 1037  | 3947         | 3383                     | 5544  | 5030  | 4873  | 3511  | 2333  |
|          | FDA007P | 2418         | 2167                     | 5096  | 2185  | 2674  | 4785  | 648   | 2384         | 2375                     | 2375  | 3190  | 2167  | 2929  | 1640  |
|          | S21     | 72           | 78                       | 140   | 110   | 117   | 117   | 8     | 63           | 73                       | 65    | 161   | 83    | 72    | 14    |
| S22      | 68      | 67           | 353                      | 45    | 92    | 131   | 8     | 60    | 63           | 165                      | 71    | 65    | 89    | 11    |       |
| S23      | 130     | 143          | 171                      | 125   | 144   | 278   | 40    | 126   | 134          | 80                       | 196   | 102   | 188   | 99    |       |
| S24      | 75      | 71           | 144                      | 78    | 160   | 134   | 10    | 72    | 79           | 67                       | 123   | 117   | 89    | 20    |       |
| Pn 9V    | FDA007A | 8502         | 7841                     | 12063 | 7926  | 4239  | 14271 | 8327  | 7771         | 6892                     | 11229 | 7748  | 5400  | 7237  | 9374  |
|          | FDA007B | 2753         | 2306                     | 4043  | 3142  | 1090  | 7306  | 1869  | 2495         | 2027                     | 3763  | 3071  | 1389  | 3607  | 2068  |
|          | FDA007C | 1161         | 1454                     | 1714  | 988   | 413   | 1562  | 1541  | 1010         | 1130                     | 1595  | 860   | 527   | 800   | 1613  |
|          | FDA007D | 9509         | 7626                     | 21546 | 13367 | 5873  | 8073  | 7098  | 8591         | 5926                     | 20055 | 11633 | 9099  | 4504  | 7026  |
|          | FDA007E | 5874         | 5515                     | 8860  | 5528  | 2899  | 10896 | 4815  | 5067         | 4286                     | 8247  | 4811  | 3872  | 5413  | 4762  |
|          | FDA007F | 966          | 1729                     | 826   | 760   | 757   | 1154  | 855   | 836          | 1158                     | 717   | 661   | 1011  | 622   | 974   |
|          | FDA007G | 2825         | 3940                     | 2656  | 3137  | 1805  | 4951  | 1732  | 2477         | 2639                     | 2304  | 2730  | 2650  | 2544  | 2077  |
|          | FDA007H | 882          | 1183                     | 533   | 1377  | 500   | 1988  | 544   | 777          | 793                      | 462   | 1308  | 734   | 1021  | 618   |
|          | FDA007I | 896          | 1321                     | 1214  | 854   | 897   | 625   | 673   | 829          | 1085                     | 1053  | 811   | 1317  | 331   | 781   |
|          | FDA007J | 2676         | 2871                     | 4400  | 2537  | 1632  | 4781  | 1470  | 2397         | 2359                     | 3816  | 2410  | 2233  | 2206  | 1762  |
|          | FDA007K | 1533         | 1877                     | 2284  | 2149  | 897   | 2146  | 731   | 1477         | 1543                     | 2784  | 2042  | 1226  | 1053  | 909   |
|          | FDA007L | 2246         | 1902                     | 2899  | 4611  | 817   | 6158  | 1003  | 2119         | 1325                     | 3533  | 4381  | 1117  | 3179  | 1247  |
|          | FDA007M | 1268         | 1637                     | 843   | 1482  | 749   | 2051  | 1325  | 1195         | 1140                     | 1028  | 1461  | 1024  | 1003  | 1644  |
|          | FDA007N | 18982        | 17312                    | 21153 | 14539 | 7888  | 33909 | 32852 | 16503        | 12055                    | 25783 | 14332 | 10788 | 17768 | 23732 |
|          | FDA007O | 1621         | 1880                     | 1561  | 1642  | 1533  | 941   | 2608  | 1507         | 1440                     | 1902  | 1618  | 2160  | 416   | 2919  |
|          | FDA007P | 2310         | 2539                     | 2341  | 2876  | 1663  | 3927  | 1360  | 2154         | 1945                     | 3316  | 2835  | 2342  | 1915  | 1212  |
|          | S21     | 72           | 142                      | 8     | 129   | 46    | 189   | 103   | 69           | 114                      | 11    | 127   | 54    | 109   | 114   |
| S22      | 7       | 4            | 17                       | 26    | 4     | 4     | 4     | 7     | 4            | 24                       | 22    | 4     | 4     | 4     |       |
| S23      | 23      | 4            | 57                       | 45    | 18    | 56    | 16    | 22    | 4            | 80                       | 39    | 21    | 30    | 16    |       |
| S24      | 14      | 12           | 25                       | 43    | 27    | 4     | 5     | 15    | 11           | 35                       | 37    | 34    | 4     | 5     |       |

Pn, pneumococcal serotype; OI, opsonic index; GMOI, geometric mean opsonic index

**Supplementary Table S1 (continued). Test sera OIs.** The consensus and the laboratory-specific OIs for the unadjusted and normalized results are shown for each serum tested in this study. Results identified as outliers are indicated in red. Outliers were included in the determination of the consensus values in this table, but are excluded in other indicated analyses.

| Serotype | Sample  | Unadjusted   |                          |       |       |       |       |       | Normalized   |                          |       |       |       |       |       |
|----------|---------|--------------|--------------------------|-------|-------|-------|-------|-------|--------------|--------------------------|-------|-------|-------|-------|-------|
|          |         | Consensus OI | Laboratory-Specific GMOI |       |       |       |       |       | Consensus OI | Laboratory-Specific GMOI |       |       |       |       |       |
|          |         |              | Lab A                    | Lab B | Lab C | Lab D | Lab E | Lab F |              | Lab A                    | Lab B | Lab C | Lab D | Lab E | Lab F |
| Pn 14    | FDA007A | 2326         | 1998                     | 3252  | 2209  | 3021  | 2445  | 1495  | 2289         | 2146                     | 1863  | 1874  | 1771  | 3625  | 3025  |
|          | FDA007B | 9299         | 7398                     | 21492 | 12486 | 9124  | 9421  | 3789  | 9290         | 7946                     | 12315 | 10590 | 6391  | 12732 | 7669  |
|          | FDA007C | 780          | 729                      | 1214  | 680   | 924   | 762   | 530   | 766          | 738                      | 695   | 577   | 541   | 1070  | 1191  |
|          | FDA007D | 4369         | 3518                     | 7151  | 5488  | 5836  | 3388  | 2548  | 4339         | 3883                     | 4097  | 4655  | 3421  | 4581  | 5725  |
|          | FDA007E | 9073         | 8337                     | 19540 | 11533 | 12171 | 3835  | 6358  | 9051         | 8856                     | 11197 | 9782  | 8003  | 5194  | 13392 |
|          | FDA007F | 888          | 775                      | 1718  | 765   | 1233  | 731   | 533   | 953          | 1161                     | 1052  | 646   | 811   | 1049  | 1122  |
|          | FDA007G | 7439         | 7338                     | 13082 | 11043 | 13093 | 4100  | 2978  | 7713         | 10998                    | 8007  | 9317  | 7090  | 5500  | 6498  |
|          | FDA007H | 998          | 823                      | 1798  | 789   | 1603  | 665   | 796   | 1041         | 1234                     | 1100  | 665   | 868   | 935   | 1736  |
|          | FDA007I | 1579         | 1563                     | 3033  | 1352  | 2315  | 1604  | 650   | 1567         | 1694                     | 1856  | 1141  | 1253  | 2200  | 1526  |
|          | FDA007J | 1276         | 1447                     | 2245  | 1019  | 1759  | 917   | 810   | 1295         | 1568                     | 1374  | 859   | 1042  | 1284  | 1901  |
|          | FDA007K | 549          | 520                      | 886   | 541   | 720   | 476   | 319   | 530          | 564                      | 501   | 398   | 427   | 673   | 695   |
|          | FDA007L | 516          | 382                      | 810   | 530   | 834   | 306   | 450   | 515          | 521                      | 457   | 389   | 495   | 443   | 917   |
|          | FDA007M | 5489         | 3924                     | 10649 | 4884  | 6274  | 4412  | 4841  | 5264         | 4889                     | 6013  | 3591  | 3719  | 5672  | 9555  |
|          | FDA007N | 2820         | 1979                     | 5676  | 2802  | 3199  | 2811  | 1776  | 2789         | 2503                     | 3205  | 2060  | 1897  | 3911  | 3864  |
|          | FDA007O | 5663         | 5198                     | 7950  | 6510  | 10223 | 6400  | 1874  | 5731         | 7220                     | 4489  | 4786  | 6090  | 8802  | 4313  |
|          | FDA007P | 3573         | 2879                     | 6983  | 4723  | 4428  | 3775  | 1312  | 3656         | 3998                     | 3458  | 4330  | 2638  | 5288  | 2963  |
|          | S17     | 146          | 86                       | 253   | 150   | 203   | IR    | 99    | 137          | 108                      | 125   | 138   | 126   | IR    | 200   |
|          | S18     | 152          | 93                       | 322   | 149   | 160   | 151   | 114   | 147          | 115                      | 160   | 136   | 99    | 186   | 230   |
|          | S19     | 210          | 146                      | 443   | 190   | 274   | 135   | 190   | 218          | 183                      | 219   | 175   | 169   | 213   | 419   |
|          | S20     | 140          | 96                       | 337   | 147   | 155   | 124   | 82    | 133          | 103                      | 167   | 135   | 91    | 144   | 187   |
| Pn 18C   | FDA007A | 2358         | 2612                     | 8153  | 1687  | 1940  | 603   | 4085  | 2218         | 2052                     | 2877  | 2573  | 1138  | 3051  | 2293  |
|          | FDA007B | 186          | 552                      | 479   | 192   | 155   | 18    | 292   | 168          | 475                      | 169   | 292   | 91    | 69    | 153   |
|          | FDA007C | 3185         | 2453                     | 11861 | 2338  | 3178  | 1140  | 4234  | 2994         | 2319                     | 4186  | 3259  | 1864  | 5072  | 2449  |
|          | FDA007D | 14936        | 14729                    | 25621 | 10048 | 8787  | 10255 | 32492 | 14662        | 13925                    | 9042  | 14004 | 5895  | 43668 | 22066 |
|          | FDA007E | 1775         | 2439                     | 5040  | 1865  | 2932  | 308   | 1509  | 1646         | 2306                     | 1779  | 2599  | 1703  | 1296  | 839   |
|          | FDA007F | 454          | 730                      | 1370  | 435   | 688   | 65    | 449   | 451          | 570                      | 668   | 607   | 399   | 304   | 292   |
|          | FDA007G | 1786         | 2713                     | 4077  | 1628  | 1992  | 356   | 2540  | 1828         | 2118                     | 1988  | 2269  | 1280  | 1660  | 1821  |
|          | FDA007H | 688          | 955                      | 2340  | 706   | 1263  | 96    | 555   | 692          | 746                      | 1141  | 1061  | 812   | 399   | 374   |
|          | FDA007I | 132          | 245                      | 713   | 185   | 194   | 4     | 198   | 110          | 280                      | 347   | 278   | 124   | 4     | 124   |
|          | FDA007J | 6771         | 4507                     | 16313 | 4711  | 8680  | 2167  | 14796 | 7161         | 5149                     | 7954  | 7078  | 5373  | 9280  | 9455  |
|          | FDA007K | 496          | 620                      | 1942  | 488   | 364   | 65    | 1079  | 552          | 709                      | 1059  | 733   | 226   | 297   | 753   |
|          | FDA007L | 321          | 397                      | 807   | 464   | 462   | 38    | 414   | 325          | 309                      | 440   | 697   | 286   | 149   | 289   |
|          | FDA007M | 647          | 1491                     | 3390  | 1022  | 1061  | 4     | 3204  | 506          | 1159                     | 1848  | 1399  | 657   | 4     | 2072  |
|          | FDA007N | 6995         | 8027                     | 19997 | 5796  | 9663  | 1538  | 8471  | 6889         | 6238                     | 10903 | 7931  | 6235  | 6647  | 4770  |
|          | FDA007O | 1954         | 2125                     | 4584  | 1967  | 2723  | 439   | 2426  | 2022         | 1983                     | 2499  | 2691  | 1577  | 2063  | 1577  |
|          | FDA007P | 670          | 771                      | 1561  | 699   | 1162  | 110   | 841   | 732          | 720                      | 1090  | 957   | 673   | 485   | 610   |
|          | S21     | 7            | 4                        | 119   | 4     | 4     | 4     | 4     | 7            | 4                        | 83    | 4     | 4     | 4     | 4     |
|          | S22     | 16           | 38                       | 53    | 21    | 14    | 4     | 6     | 13           | 36                       | 37    | 26    | 8     | 4     | 5     |
|          | S23     | 10           | 4                        | 52    | 18    | 11    | 4     | 7     | 9            | 4                        | 36    | 22    | 6     | 4     | 6     |
|          | S24     | 29           | 40                       | 43    | 45    | 42    | 4     | 46    | 24           | 31                       | 30    | 55    | 25    | 4     | 31    |

Pn, pneumococcal serotype; OI, opsonic index; GMOI, geometric mean opsonic index

**Supplementary Table S1 (continued). Test sera OIs.** The consensus and the laboratory-specific OIs for the unadjusted and normalized results are shown for each serum tested in this study. Results identified as outliers are indicated in red. Outliers were included in the determination of the consensus values in this table, but are excluded in other indicated analyses.

| Serotype | Sample  | Unadjusted   |                          |       |       |       |       |       | Normalized   |                          |       |       |       |       |       |
|----------|---------|--------------|--------------------------|-------|-------|-------|-------|-------|--------------|--------------------------|-------|-------|-------|-------|-------|
|          |         | Consensus OI | Laboratory-Specific GMOI |       |       |       |       |       | Consensus OI | Laboratory-Specific GMOI |       |       |       |       |       |
|          |         |              | Lab A                    | Lab B | Lab C | Lab D | Lab E | Lab F |              | Lab A                    | Lab B | Lab C | Lab D | Lab E | Lab F |
| Pn 19A   | FDA007A | 1318         | 655                      | 4805  | 2090  | 1570  | NT    | 385   | 1252         | 848                      | 2205  | 1367  | 883   | NT    | 1363  |
|          | FDA007B | 726          | 467                      | 2859  | 940   | 858   | NT    | 188   | 693          | 605                      | 1312  | 615   | 483   | NT    | 678   |
|          | FDA007C | 841          | 664                      | 1973  | 1171  | 1024  | NT    | 267   | 771          | 769                      | 906   | 766   | 576   | NT    | 886   |
|          | FDA007D | 3868         | 2283                     | 12076 | 4156  | 4228  | NT    | 1786  | 3519         | 2644                     | 5541  | 2718  | 2379  | NT    | 5696  |
|          | FDA007E | 306          | 353                      | 2527  | 668   | 674   | NT    | 7     | 249          | 415                      | 1160  | 437   | 430   | NT    | 11    |
|          | FDA007F | 151          | 129                      | 676   | 277   | 271   | NT    | 12    | 137          | 175                      | 305   | 179   | 173   | NT    | 29    |
|          | FDA007G | 1271         | 915                      | 2492  | 1886  | 2354  | NT    | 328   | 1221         | 1294                     | 1124  | 1220  | 1326  | NT    | 1151  |
|          | FDA007H | 669          | 595                      | 1732  | 952   | 998   | NT    | 137   | 638          | 841                      | 781   | 616   | 562   | NT    | 467   |
|          | FDA007I | 110          | 80                       | 497   | 190   | 221   | NT    | 10    | 97           | 101                      | 224   | 123   | 125   | NT    | 25    |
|          | FDA007J | 993          | 728                      | 3877  | 1308  | 1304  | NT    | 201   | 951          | 962                      | 1749  | 846   | 713   | NT    | 765   |
|          | FDA007K | 437          | 297                      | 1241  | 533   | 529   | NT    | 153   | 410          | 393                      | 597   | 315   | 289   | NT    | 543   |
|          | FDA007L | 561          | 361                      | 1578  | 772   | 771   | NT    | 164   | 546          | 574                      | 759   | 455   | 421   | NT    | 581   |
|          | FDA007M | 1674         | 1180                     | 3728  | 2016  | 2899  | NT    | 511   | 1670         | 1878                     | 1792  | 1190  | 1585  | NT    | 2048  |
|          | FDA007N | 1421         | 726                      | 4872  | 1835  | 1488  | NT    | 601   | 1388         | 1155                     | 2342  | 1083  | 813   | NT    | 2160  |
|          | FDA007O | 2177         | 1277                     | 10959 | 3170  | 2268  | NT    | 486   | 2171         | 1885                     | 5267  | 1871  | 1501  | NT    | 1728  |
|          | FDA007P | 1529         | 864                      | 5059  | 2348  | 1722  | NT    | 474   | 1525         | 1274                     | 1954  | 1609  | 1140  | NT    | 1804  |
|          | S17     | 57           | 49                       | 241   | 113   | 110   | NT    | 4     | 40           | 58                       | 93    | 78    | 63    | NT    | 4     |
|          | S18     | 90           | 64                       | 295   | 134   | 122   | NT    | 19    | 77           | 76                       | 114   | 92    | 70    | NT    | 50    |
|          | S19     | 88           | 68                       | 227   | 115   | 124   | NT    | 24    | 81           | 80                       | 88    | 79    | 71    | NT    | 87    |
| S20      | 50      | 37           | 295                      | 83    | 85    | NT    | 4     | 36    | 48           | 114                      | 57    | 48    | NT    | 4     |       |
| Pn 19F   | FDA007A | 1968         | 3513                     | 3993  | 1092  | 1825  | 682   | 3027  | 1910         | 2534                     | 3969  | 1558  | 966   | 1583  | 2009  |
|          | FDA007B | 681          | 1551                     | 1656  | 400   | 585   | 127   | 1313  | 632          | 1119                     | 1646  | 570   | 310   | 230   | 842   |
|          | FDA007C | 583          | 1213                     | 1280  | 618   | 997   | 61    | 608   | 613          | 893                      | 1273  | 875   | 527   | 175   | 488   |
|          | FDA007D | 2750         | 4461                     | 3701  | 1685  | 3397  | 1383  | 3259  | 2671         | 3285                     | 3679  | 2385  | 1797  | 2769  | 2545  |
|          | FDA007E | 5245         | 7034                     | 12721 | 3041  | 7460  | 2331  | 4400  | 5157         | 5180                     | 12646 | 4305  | 3885  | 5192  | 3310  |
|          | FDA007F | 132          | 347                      | 250   | 179   | 216   | 10    | 155   | 120          | 252                      | 242   | 254   | 113   | 13    | 128   |
|          | FDA007G | 2292         | 2637                     | 4134  | 1793  | 3438  | 886   | 2434  | 2260         | 1917                     | 4009  | 2539  | 1901  | 1709  | 2089  |
|          | FDA007H | 623          | 1016                     | 1013  | 618   | 1092  | 112   | 748   | 616          | 739                      | 982   | 831   | 604   | 217   | 681   |
|          | FDA007I | 626          | 1124                     | 1443  | 496   | 738   | 142   | 712   | 604          | 760                      | 1399  | 667   | 408   | 279   | 599   |
|          | FDA007J | 1008         | 1640                     | 2252  | 699   | 1508  | 286   | 946   | 950          | 1109                     | 2184  | 939   | 780   | 511   | 806   |
|          | FDA007K | 234          | 430                      | 386   | 222   | 363   | 37    | 327   | 230          | 291                      | 366   | 298   | 188   | 79    | 313   |
|          | FDA007L | 186          | 364                      | 236   | 250   | 358   | 21    | 260   | 186          | 251                      | 224   | 336   | 185   | 46    | 257   |
|          | FDA007M | 1497         | 2132                     | 1689  | 1173  | 2251  | 688   | 1723  | 1445         | 1469                     | 1602  | 1669  | 1164  | 1337  | 1466  |
|          | FDA007N | 2831         | 3662                     | 4257  | 1725  | 3125  | 1553  | 3943  | 2669         | 2522                     | 4039  | 2454  | 1615  | 3019  | 2977  |
|          | FDA007O | 522          | 1411                     | 745   | 427   | 508   | 138   | 622   | 522          | 1139                     | 707   | 607   | 266   | 251   | 587   |
|          | FDA007P | 894          | 1297                     | 1050  | 722   | 1310  | 284   | 1399  | 902          | 1047                     | 1144  | 1027  | 685   | 571   | 1093  |
|          | S21     | 7            | 4                        | 4     | 6     | 18    | 4     | 18    | 6            | 4                        | 4     | 6     | 9     | 4     | 19    |
|          | S22     | 6            | 4                        | 34    | 4     | 4     | 4     | 4     | 6            | 4                        | 37    | 4     | 4     | 4     | 4     |
|          | S23     | 26           | 53                       | 29    | 41    | 42    | 4     | 31    | 24           | 41                       | 32    | 58    | 21    | 4     | 33    |
| S24      | 5       | 4            | 11                       | 4     | 4     | 4     | 5     | 5     | 4            | 13                       | 4     | 4     | 4     | 5     |       |

Pn, pneumococcal serotype; OI, opsonic index; GMOI, geometric mean opsonic index

**Supplementary Table S1 (continued). Test sera OIs.** The consensus and the laboratory-specific OIs for the unadjusted and normalized results are shown for each serum tested in this study. Results identified as outliers are indicated in red. Outliers were included in the determination of the consensus values in this table, but are excluded in other indicated analyses.

| Serotype | Sample  | Unadjusted   |                          |       |       |       |       |       | Normalized   |                          |       |       |       |       |       |
|----------|---------|--------------|--------------------------|-------|-------|-------|-------|-------|--------------|--------------------------|-------|-------|-------|-------|-------|
|          |         | Consensus OI | Laboratory-Specific GMOI |       |       |       |       |       | Consensus OI | Laboratory-Specific GMOI |       |       |       |       |       |
|          |         |              | Lab A                    | Lab B | Lab C | Lab D | Lab E | Lab F |              | Lab A                    | Lab B | Lab C | Lab D | Lab E | Lab F |
| Pn 23F   | FDA007A | 94           | 270                      | 307   | IR    | 9     | 2375  | 4     | 69           | 297                      | 137   | IR    | 13    | 774   | 4     |
|          | FDA007B | 3201         | 2326                     | 9834  | 1768  | 1715  | 16121 | 967   | 3066         | 2833                     | 4382  | 2808  | 2116  | 5859  | 1956  |
|          | FDA007C | 154          | 257                      | 504   | 213   | 159   | 788   | 4     | 129          | 352                      | 225   | 319   | 197   | 227   | 4     |
|          | FDA007D | 939          | 684                      | 1632  | 701   | 912   | 2590  | 370   | 887          | 936                      | 727   | 1047  | 1125  | 777   | 767   |
|          | FDA007E | 3067         | 2754                     | 7217  | 1538  | 1939  | 10307 | 1361  | 2887         | 3771                     | 3216  | 2299  | 2340  | 2975  | 2990  |
|          | FDA007F | 61           | 98                       | 193   | 112   | 104   | 4     | 58    | 70           | 101                      | 109   | 168   | 126   | 4     | 123   |
|          | FDA007G | 6423         | 4362                     | 11565 | 4694  | 7226  | 13443 | 3053  | 6240         | 4471                     | 6560  | 7016  | 8478  | 4292  | 7562  |
|          | FDA007H | 581          | 589                      | 967   | 434   | 495   | 1856  | 168   | 559          | 604                      | 549   | 693   | 580   | 581   | 380   |
|          | FDA007I | 275          | 457                      | 855   | 416   | 561   | 1192  | 4     | 232          | 506                      | 485   | 663   | 658   | 360   | 4     |
|          | FDA007J | 1100         | 930                      | 2595  | 584   | 733   | 3195  | 532   | 1086         | 1061                     | 1472  | 931   | 924   | 1029  | 1194  |
|          | FDA007K | 989          | 672                      | 2169  | 689   | 1184  | 1435  | 549   | 1051         | 880                      | 1239  | 1100  | 1493  | 498   | 1502  |
|          | FDA007L | 70           | 116                      | 213   | 131   | 111   | 4     | 77    | 90           | 179                      | 122   | 209   | 139   | 4     | 210   |
|          | FDA007M | 878          | 493                      | 1699  | 604   | 768   | 3000  | 394   | 957          | 846                      | 971   | 974   | 968   | 970   | 1024  |
|          | FDA007N | 840          | 447                      | 1170  | 506   | 678   | 4263  | 458   | 910          | 687                      | 669   | 815   | 854   | 1492  | 1205  |
|          | FDA007O | 206          | 416                      | 765   | 272   | 96    | 2263  | 4     | 179          | 463                      | 437   | 439   | 133   | 695   | 4     |
|          | FDA007P | 1529         | 1425                     | 2313  | 1120  | 1373  | 4920  | 513   | 1627         | 1562                     | 1835  | 1804  | 1833  | 1496  | 1293  |
| S21      | 4       | 4            | 4                        | 4     | 4     | 4     | 4     | 4     | 4            | 4                        | 4     | 4     | 4     | 4     |       |
| S22      | 4       | 4            | 4                        | 4     | 4     | 4     | 4     | 4     | 4            | 4                        | 4     | 4     | 4     | 4     |       |
| S23      | 108     | 90           | 128                      | 120   | 119   | 213   | 47    | 109   | 106          | 102                      | 187   | 124   | 46    | 130   |       |
| S24      | 4       | 4            | 4                        | 4     | 4     | 4     | 4     | 4     | 4            | 4                        | 4     | 4     | 4     | 4     |       |

Pn, pneumococcal serotype; OI, opsonic index; GMOI, geometric mean opsonic index; IR, irregular (Lab C reported IR for each of the five runs for FDA007A, serotype 23F)

**Supplementary Table S2. The effect of normalization on individual samples.** The overall reduction in variability due to normalization is shown for each test sample. Estimates of various variance components and CVs from the ANOVA are also shown. Outliers are included in these analyses.

| Serotype | Sample  | Unadjusted |              |                    |          |      | Normalized |              |                    |          |        | Reduction In Variation (%) |
|----------|---------|------------|--------------|--------------------|----------|------|------------|--------------|--------------------|----------|--------|----------------------------|
|          |         | Estimate   | 95% CI       | Variance Estimates |          | %CV  | Estimate   | 95% CI       | Variance Estimates |          | %CV    |                            |
|          |         |            |              | Lab                | Run(Lab) |      |            |              | Lab                | Run(Lab) |        |                            |
| Pn1      | FDA007A | 311        | (174, 555)   | 0.2971             | 0.0339   | 78%  | 309        | (262, 365)   | 0.0129             | 0.0607   | 31%    | 77.8%                      |
|          | FDA007B | 272        | (145, 512)   | 0.3451             | 0.0815   | 92%  | 264        | (210, 332)   | 0.0246             | 0.1125   | 45%    | 67.9%                      |
|          | FDA007C | 266        | (137, 515)   | 0.3845             | 0.0637   | 95%  | 251        | (216, 292)   | 0.0051             | 0.0797   | 34%    | 81.1%                      |
|          | FDA007D | 434        | (219, 859)   | 0.4073             | 0.0762   | 100% | 412        | (248, 684)   | 0.2109             | 0.1102   | 76%    | 33.6%                      |
|          | FDA007E | 72         | (10, 496)    | 3.3602             | 0.1736   | 555% | 65         | (11, 374)    | 2.7294             | 0.1918   | 452%   | 17.3%                      |
|          | FDA007F | 77         | (36, 161)    | 0.4976             | 0.0427   | 109% | 79         | (54, 114)    | 0.1197             | 0.0464   | 50%    | 69.3%                      |
|          | FDA007G | 1709       | (1071, 2726) | 0.1855             | 0.0623   | 65%  | 1777       | (1304, 2420) | 0.0751             | 0.0587   | 44%    | 46.0%                      |
|          | FDA007H | 123        | (58, 259)    | 0.4955             | 0.0603   | 111% | 128        | (86, 190)    | 0.1347             | 0.0414   | 52%    | 68.3%                      |
|          | FDA007I | 117        | (55, 248)    | 0.4976             | 0.0815   | 114% | 118        | (90, 157)    | 0.0536             | 0.0864   | 45%    | 75.8%                      |
|          | FDA007J | 110        | (63, 192)    | 0.2697             | 0.0771   | 80%  | 111        | (95, 130)    | 0.0053             | 0.0828   | 35%    | 74.6%                      |
|          | FDA007K | 234        | (131, 419)   | 0.2930             | 0.0665   | 82%  | 247        | (194, 315)   | 0.0427             | 0.0524   | 36%    | 73.5%                      |
|          | FDA007L | 141        | (65, 306)    | 0.5335             | 0.0721   | 118% | 146        | (102, 211)   | 0.1107             | 0.0573   | 51%    | 72.3%                      |
|          | FDA007M | 10         | (2, 41)      | 1.8149             | 0.0776   | 296% | 8          | (3, 24)      | 1.0336             | 0.1267   | 194%   | 38.7%                      |
|          | FDA007N | 148        | (66, 331)    | 0.5602             | 0.1305   | 130% | 157        | (111, 220)   | 0.0748             | 0.1468   | 60%    | 67.9%                      |
|          | FDA007O | 592        | (347, 1009)  | 0.2457             | 0.0666   | 75%  | 618        | (471, 810)   | 0.0514             | 0.0766   | 43%    | 59.0%                      |
|          | FDA007P | 270        | (169, 429)   | 0.1926             | 0.0197   | 59%  | 275        | (216, 352)   | 0.0393             | 0.0738   | 40%    | 46.7%                      |
|          | S21     | 4          | (4, 5)       | 0.0000             | 0.0507   | 25%  | 4          | (4, 4)       | 0.0000             | 0.0191   | 15%    | 62.4%                      |
| S22      | 5       | (3, 6)     | 0.0578       | 0.0733             | 44%      | 5    | (3, 6)     | 0.0672       | 0.0911             | 49%      | -17.2% |                            |
| S23      | 14      | (5, 36)    | 0.7861       | 0.1326             | 161%     | 15   | (5, 45)    | 1.0160       | 0.1205             | 190%     | -19.2% |                            |
| S24      | 6       | (3, 14)    | 0.5753       | 0.0355             | 118%     | 6    | (3, 12)    | 0.4089       | 0.0668             | 99%      | 22.1%  |                            |
| Pn3      | FDA007A | 69         | (28, 173)    | 0.7311             | 0.1122   | 151% | 64         | (30, 140)    | 0.5281             | 0.0969   | 120%   | 25.9%                      |
|          | FDA007B | 66         | (21, 208)    | 1.1603             | 0.1545   | 215% | 61         | (24, 155)    | 0.7552             | 0.1316   | 156%   | 32.6%                      |
|          | FDA007C | 30         | (18, 49)     | 0.2178             | 0.0583   | 69%  | 29         | (25, 33)     | 0.0000             | 0.0970   | 37%    | 64.9%                      |
|          | FDA007D | 190        | (79, 457)    | 0.6769             | 0.0911   | 140% | 184        | (104, 326)   | 0.2779             | 0.0979   | 85%    | 51.1%                      |
|          | FDA007E | 94         | (24, 366)    | 1.6153             | 0.2194   | 287% | 86         | (33, 224)    | 0.7811             | 0.2567   | 177%   | 43.4%                      |
|          | FDA007F | 38         | (23, 61)     | 0.1965             | 0.0819   | 69%  | 35         | (30, 41)     | 0.0000             | 0.1009   | 37%    | 63.8%                      |
|          | FDA007G | 313        | (203, 483)   | 0.1587             | 0.0630   | 60%  | 309        | (255, 375)   | 0.0172             | 0.0839   | 37%    | 54.4%                      |
|          | FDA007H | 48         | (23, 101)    | 0.4820             | 0.1015   | 115% | 47         | (31, 71)     | 0.1476             | 0.0649   | 59%    | 63.6%                      |
|          | FDA007I | 32         | (12, 80)     | 0.7706             | 0.0879   | 153% | 29         | (15, 55)     | 0.3380             | 0.1440   | 100%   | 43.9%                      |
|          | FDA007J | 12         | (4, 38)      | 1.2161             | 0.1563   | 223% | 10         | (3, 31)      | 1.1559             | 0.0912   | 205%   | 9.1%                       |
|          | FDA007K | 44         | (22, 87)     | 0.3903             | 0.1429   | 108% | 39         | (27, 57)     | 0.0862             | 0.1686   | 66%    | 52.2%                      |
|          | FDA007L | 58         | (32, 107)    | 0.3187             | 0.0891   | 89%  | 54         | (46, 64)     | 0.0100             | 0.0693   | 33%    | 80.6%                      |
|          | FDA007M | 96         | (42, 220)    | 0.6085             | 0.0688   | 128% | 87         | (60, 127)    | 0.1066             | 0.1154   | 60%    | 67.2%                      |
|          | FDA007N | 305        | (171, 545)   | 0.2879             | 0.0846   | 84%  | 281        | (239, 331)   | 0.0029             | 0.1073   | 39%    | 70.4%                      |
|          | FDA007O | 134        | (73, 248)    | 0.3230             | 0.0979   | 91%  | 123        | (84, 180)    | 0.1150             | 0.0784   | 55%    | 54.0%                      |
|          | FDA007P | 196        | (89, 433)    | 0.5580             | 0.0530   | 119% | 189        | (132, 270)   | 0.0944             | 0.1061   | 56%    | 67.2%                      |
|          | S21     | 4          | (4, 4)       | 0.0000             | 0.0000   | 0%   | 4          | (4, 4)       | 0.0000             | 0.0000   | 0%     | NA                         |
| S22      | 4       | (4, 5)     | 0.0127       | 0.0436             | 27%      | 4    | (4, 4)     | 0.0019       | 0.0073             | 10%      | 83.6%  |                            |
| S23      | 5       | (3, 6)     | 0.0756       | 0.0667             | 46%      | 4    | (4, 5)     | 0.0027       | 0.0117             | 13%      | 89.9%  |                            |
| S24      | 4       | (4, 4)     | 0.0000       | 0.0000             | 0%       | 4    | (4, 4)     | 0.0000       | 0.0000             | 0%       | NA     |                            |

**Pn**, pneumococcal serotype; **CI**, confidence interval; **CV**, coefficient of variation (expressed as a percent); **Lab**, variability among the laboratories; **Run(Lab)**, variability among the runs within each laboratory.



**Supplementary Table S2 (continued). The effect of normalization on individual samples.** The overall reduction in variability due to normalization is shown for each test sample. Estimates of various variance components and CVs from the ANOVA are also shown. Outliers are included in these analyses.

| Serotype | Sample  | Unadjusted |               |                    |          |      | Normalized |               |                    |          |      | Reduction In Variation (%) |
|----------|---------|------------|---------------|--------------------|----------|------|------------|---------------|--------------------|----------|------|----------------------------|
|          |         | Estimate   | 95% CI        | Variance Estimates |          | %CV  | Estimate   | 95% CI        | Variance Estimates |          | %CV  |                            |
|          |         |            |               | Lab                | Run(Lab) |      |            |               | Lab                | Run(Lab) |      |                            |
| Pn4      | FDA007A | 5157       | (2634, 10099) | 0.3920             | 0.0902   | 100% | 5371       | (4262, 6768)  | 0.0318             | 0.0809   | 40%  | 76.6%                      |
|          | FDA007B | 1542       | (874, 2721)   | 0.2769             | 0.0777   | 81%  | 1617       | (1437, 1821)  | 0.0004             | 0.0598   | 28%  | 83.0%                      |
|          | FDA007C | 3848       | (1963, 7544)  | 0.3997             | 0.0580   | 97%  | 3890       | (2582, 5862)  | 0.1343             | 0.0881   | 60%  | 51.4%                      |
|          | FDA007D | 10515      | (5658, 19545) | 0.3305             | 0.0917   | 92%  | 10815      | (8833, 13240) | 0.0176             | 0.0944   | 40%  | 73.5%                      |
|          | FDA007E | 3955       | (1725, 9070)  | 0.6025             | 0.1093   | 132% | 4118       | (2755, 6155)  | 0.1234             | 0.1072   | 62%  | 67.6%                      |
|          | FDA007F | 396        | (207, 760)    | 0.3647             | 0.0978   | 97%  | 430        | (312, 593)    | 0.0651             | 0.1320   | 56%  | 57.4%                      |
|          | FDA007G | 1822       | (1152, 2881)  | 0.1761             | 0.0730   | 65%  | 1949       | (1441, 2637)  | 0.0745             | 0.0409   | 40%  | 53.7%                      |
|          | FDA007H | 1350       | (843, 2162)   | 0.1814             | 0.0988   | 70%  | 1462       | (1272, 1680)  | 0.0000             | 0.0853   | 34%  | 69.6%                      |
|          | FDA007I | 610        | (389, 957)    | 0.1607             | 0.1172   | 69%  | 653        | (566, 752)    | 0.0075             | 0.0523   | 28%  | 78.5%                      |
|          | FDA007J | 1189       | (649, 2178)   | 0.3013             | 0.1408   | 94%  | 1205       | (995, 1458)   | 0.0196             | 0.0601   | 33%  | 82.0%                      |
|          | FDA007K | 820        | (516, 1302)   | 0.1878             | 0.0318   | 60%  | 799        | (584, 1094)   | 0.0721             | 0.0845   | 49%  | 28.7%                      |
|          | FDA007L | 1440       | (773, 2681)   | 0.3239             | 0.1347   | 97%  | 1459       | (1109, 1921)  | 0.0438             | 0.1194   | 50%  | 64.4%                      |
|          | FDA007M | 2873       | (1696, 4866)  | 0.2320             | 0.0906   | 76%  | 2760       | (1877, 4059)  | 0.1028             | 0.1414   | 64%  | 24.3%                      |
|          | FDA007N | 4163       | (2368, 7321)  | 0.2725             | 0.0836   | 82%  | 4257       | (2990, 6062)  | 0.0958             | 0.0850   | 53%  | 49.3%                      |
|          | FDA007O | 7735       | (4559, 13123) | 0.2389             | 0.0744   | 75%  | 8089       | (7258, 9015)  | 0.0005             | 0.0492   | 25%  | 84.1%                      |
|          | FDA007P | 2970       | (1639, 5381)  | 0.3033             | 0.0839   | 86%  | 3023       | (2632, 3471)  | 0.0000             | 0.0810   | 33%  | 79.1%                      |
|          | S17     | 84         | (16, 432)     | 2.4342             | 0.0226   | 379% | 77         | (17, 361)     | 2.1349             | 0.0519   | 339% | 11.0%                      |
|          | S18     | 96         | (17, 529)     | 2.6355             | 0.0855   | 420% | 89         | (17, 461)     | 2.4432             | 0.0952   | 392% | 6.7%                       |
|          | S19     | 60         | (13, 276)     | 2.1073             | 0.0662   | 337% | 58         | (14, 230)     | 1.7179             | 0.0869   | 283% | 17.0%                      |
|          | S20     | 85         | (16, 449)     | 2.4824             | 0.0652   | 393% | 86         | (17, 423)     | 2.3041             | 0.0453   | 363% | 7.8%                       |
| Pn5      | FDA007A | 489        | (262, 915)    | 0.3367             | 0.0911   | 92%  | 475        | (338, 670)    | 0.0810             | 0.1228   | 57%  | 52.4%                      |
|          | FDA007B | 329        | (204, 530)    | 0.1851             | 0.1117   | 72%  | 324        | (218, 482)    | 0.1176             | 0.1185   | 63%  | 20.5%                      |
|          | FDA007C | 364        | (209, 634)    | 0.2681             | 0.0605   | 77%  | 345        | (281, 423)    | 0.0218             | 0.0783   | 37%  | 69.5%                      |
|          | FDA007D | 1513       | (921, 2487)   | 0.2172             | 0.0337   | 65%  | 1458       | (1085, 1959)  | 0.0688             | 0.0499   | 41%  | 52.7%                      |
|          | FDA007E | 153        | (74, 313)     | 0.4548             | 0.0647   | 106% | 145        | (95, 222)     | 0.1505             | 0.0577   | 58%  | 59.9%                      |
|          | FDA007F | 223        | (159, 313)    | 0.0960             | 0.0386   | 44%  | 221        | (165, 296)    | 0.0564             | 0.0988   | 48%  | -13.3%                     |
|          | FDA007G | 298        | (253, 351)    | 0.0162             | 0.0391   | 27%  | 305        | (218, 427)    | 0.0869             | 0.0760   | 50%  | -66.0%                     |
|          | FDA007H | 337        | (141, 807)    | 0.6766             | 0.0848   | 139% | 351        | (192, 645)    | 0.3162             | 0.0884   | 89%  | 46.9%                      |
|          | FDA007I | 95         | (55, 163)     | 0.2489             | 0.0827   | 78%  | 93         | (63, 136)     | 0.1117             | 0.1003   | 58%  | 36.0%                      |
|          | FDA007J | 10         | (5, 20)       | 0.4672             | 0.0512   | 105% | 10         | (5, 21)       | 0.5104             | 0.0933   | 117% | -14.1%                     |
|          | FDA007K | 2265       | (954, 5376)   | 0.6746             | 0.0191   | 130% | 2343       | (1320, 4157)  | 0.2894             | 0.0441   | 78%  | 51.9%                      |
|          | FDA007L | 72         | (35, 147)     | 0.4477             | 0.0849   | 107% | 74         | (45, 121)     | 0.2086             | 0.0807   | 71%  | 45.7%                      |
|          | FDA007M | 144        | (70, 297)     | 0.4601             | 0.0891   | 110% | 155        | (96, 253)     | 0.1918             | 0.1081   | 73%  | 45.4%                      |
|          | FDA007N | 2279       | (1244, 4173)  | 0.3238             | 0.0436   | 83%  | 2447       | (1801, 3324)  | 0.0767             | 0.0412   | 41%  | 67.9%                      |
|          | FDA007O | 118        | (52, 268)     | 0.5751             | 0.1654   | 136% | 123        | (60, 252)     | 0.4339             | 0.1831   | 119% | 16.7%                      |
|          | FDA007P | 498        | (268, 925)    | 0.3342             | 0.0663   | 88%  | 525        | (365, 755)    | 0.1091             | 0.0524   | 49%  | 59.7%                      |
|          | S21     | 5          | (3, 6)        | 0.1024             | 0.0016   | 38%  | 4          | (4, 5)        | 0.0304             | 0.0053   | 21%  | 65.6%                      |
|          | S22     | 4          | (4, 4)        | 0.0000             | 0.0000   | 0%   | 4          | (4, 4)        | 0.0000             | 0.0000   | 0%   | NA                         |
|          | S23     | 4          | (4, 4)        | 0.0000             | 0.0000   | 0%   | 4          | (4, 4)        | 0.0000             | 0.0000   | 0%   | NA                         |
|          | S24     | 4          | (4, 4)        | 0.0000             | 0.0000   | 0%   | 4          | (4, 4)        | 0.0000             | 0.0000   | 0%   | NA                         |

Pn, pneumococcal serotype; CI, confidence interval; CV, coefficient of variation (expressed as a percent); Lab, variability among the laboratories; Run(Lab), variability among the runs within each laboratory.

**Supplementary Table S2 (continued). The effect of normalization on individual samples.** The overall reduction in variability due to normalization is shown for each test sample. Estimates of various variance components and CVs from the ANOVA are also shown. Outliers are included in these analyses.

| Serotype | Sample  | Unadjusted |                |                    |          |      | Normalized |                |                    |          |        | Reduction In Variation (%) |
|----------|---------|------------|----------------|--------------------|----------|------|------------|----------------|--------------------|----------|--------|----------------------------|
|          |         | Estimate   | 95% CI         | Variance Estimates |          | %CV  | Estimate   | 95% CI         | Variance Estimates |          | %CV    |                            |
|          |         |            |                | Lab                | Run(Lab) |      |            |                | Lab                | Run(Lab) |        |                            |
| Pn6A     | FDA007A | 1316       | (803, 2156)    | 0.1982             | 0.1160   | 75%  | 1270       | (884, 1825)    | 0.1057             | 0.0655   | 51%    | 45.5%                      |
|          | FDA007B | 1104       | (660, 1848)    | 0.2028             | 0.1908   | 87%  | 1069       | (798, 1433)    | 0.0594             | 0.0887   | 47%    | 62.4%                      |
|          | FDA007C | 795        | (515, 1228)    | 0.1485             | 0.1115   | 67%  | 717        | (519, 991)     | 0.0811             | 0.0650   | 47%    | 43.8%                      |
|          | FDA007D | 19974      | (12900, 30927) | 0.1477             | 0.1293   | 69%  | 20197      | (13192, 30924) | 0.1401             | 0.1182   | 66%    | 6.7%                       |
|          | FDA007E | 2906       | (1721, 4905)   | 0.2314             | 0.0878   | 76%  | 2803       | (2192, 3585)   | 0.0386             | 0.0787   | 41%    | 63.3%                      |
|          | FDA007F | 1534       | (949, 2480)    | 0.1959             | 0.0675   | 67%  | 1460       | (1107, 1924)   | 0.0508             | 0.0891   | 45%    | 46.9%                      |
|          | FDA007G | 2930       | (1670, 5142)   | 0.2715             | 0.0784   | 81%  | 2895       | (1793, 4674)   | 0.1862             | 0.1063   | 72%    | 16.4%                      |
|          | FDA007H | 1576       | (980, 2536)    | 0.1928             | 0.0634   | 66%  | 1510       | (1051, 2170)   | 0.1051             | 0.0682   | 52%    | 32.3%                      |
|          | FDA007I | 375        | (272, 518)     | 0.0590             | 0.1769   | 63%  | 390        | (302, 502)     | 0.0419             | 0.0787   | 42%    | 48.9%                      |
|          | FDA007J | 1400       | (979, 2001)    | 0.0944             | 0.1075   | 57%  | 1397       | (1102, 1772)   | 0.0291             | 0.1066   | 45%    | 32.8%                      |
|          | FDA007K | 362        | (254, 517)     | 0.0632             | 0.2601   | 77%  | 362        | (290, 452)     | 0.0176             | 0.1299   | 47%    | 54.4%                      |
|          | FDA007L | 126        | (24, 650)      | 2.4236             | 0.1268   | 394% | 116        | (22, 613)      | 2.4880             | 0.1730   | 411%   | -4.2%                      |
|          | FDA007M | 2444       | (1878, 3180)   | 0.0423             | 0.1034   | 46%  | 2413       | (2128, 2737)   | 0.0000             | 0.0696   | 30%    | 52.2%                      |
|          | FDA007N | 619        | (346, 1108)    | 0.2895             | 0.0873   | 85%  | 623        | (373, 1041)    | 0.2260             | 0.0636   | 71%    | 23.1%                      |
|          | FDA007O | 1105       | (772, 1583)    | 0.0987             | 0.0923   | 55%  | 1172       | (919, 1495)    | 0.0436             | 0.0479   | 35%    | 52.1%                      |
|          | FDA007P | 5047       | (3191, 7984)   | 0.1749             | 0.0801   | 66%  | 5171       | (3888, 6879)   | 0.0605             | 0.0648   | 42%    | 50.9%                      |
|          | S21     | 6          | (2, 15)        | 0.7840             | 0.1037   | 157% | 6          | (2, 13)        | 0.5759             | 0.1520   | 135%   | 18.0%                      |
| S22      | 46      | (28, 77)   | 0.2197         | 0.0782             | 73%      | 48   | (27, 86)   | 0.2933         | 0.0721             | 83%      | -18.5% |                            |
| S23      | 25      | (11, 57)   | 0.6036         | 0.1719             | 141%     | 26   | (10, 65)   | 0.7018         | 0.3222             | 175%     | -24.3% |                            |
| S24      | 9       | (3, 26)    | 0.9660         | 0.1747             | 191%     | 8    | (3, 21)    | 0.7724         | 0.0972             | 154%     | 23.8%  |                            |
| Pn6B     | FDA007A | 789        | (468, 1330)    | 0.2222             | 0.1281   | 81%  | 763        | (500, 1165)    | 0.1212             | 0.1977   | 76%    | 9.0%                       |
|          | FDA007B | 861        | (528, 1404)    | 0.2005             | 0.0811   | 70%  | 831        | (681, 1014)    | 0.0100             | 0.1253   | 44%    | 51.9%                      |
|          | FDA007C | 2225       | (1393, 3555)   | 0.1826             | 0.0842   | 68%  | 2264       | (1598, 3207)   | 0.0915             | 0.0894   | 53%    | 32.2%                      |
|          | FDA007D | 13018      | (7521, 22534)  | 0.2533             | 0.1003   | 81%  | 13346      | (10226, 17420) | 0.0451             | 0.0931   | 45%    | 60.9%                      |
|          | FDA007E | 3400       | (2194, 5268)   | 0.1613             | 0.0646   | 61%  | 3561       | (2906, 4362)   | 0.0218             | 0.0754   | 37%    | 57.0%                      |
|          | FDA007F | 1479       | (850, 2575)    | 0.2627             | 0.0806   | 80%  | 1646       | (1151, 2354)   | 0.1019             | 0.0684   | 51%    | 50.4%                      |
|          | FDA007G | 5930       | (2823, 12454)  | 0.4905             | 0.0481   | 108% | 6066       | (3204, 11483)  | 0.3603             | 0.0456   | 89%    | 24.6%                      |
|          | FDA007H | 1313       | (858, 2009)    | 0.1510             | 0.0666   | 59%  | 1368       | (961, 1947)    | 0.0989             | 0.0686   | 51%    | 23.0%                      |
|          | FDA007I | 423        | (272, 658)     | 0.1590             | 0.0729   | 62%  | 397        | (340, 464)     | 0.0000             | 0.0983   | 37%    | 57.6%                      |
|          | FDA007J | 2068       | (1366, 3131)   | 0.1362             | 0.1000   | 63%  | 1906       | (1601, 2269)   | 0.0081             | 0.0940   | 38%    | 56.8%                      |
|          | FDA007K | 651        | (407, 1040)    | 0.1907             | 0.0436   | 62%  | 610        | (490, 761)     | 0.0268             | 0.0835   | 39%    | 52.9%                      |
|          | FDA007L | 182        | (35, 941)      | 2.4239             | 0.0815   | 387% | 155        | (24, 989)      | 3.0703             | 0.1129   | 495%   | -21.3%                     |
|          | FDA007M | 4247       | (2376, 7591)   | 0.2781             | 0.1413   | 91%  | 4186       | (2921, 5998)   | 0.1010             | 0.0793   | 53%    | 57.0%                      |
|          | FDA007N | 1975       | (1106, 3524)   | 0.2820             | 0.1142   | 88%  | 1923       | (1260, 2937)   | 0.1389             | 0.1147   | 65%    | 36.0%                      |
|          | FDA007O | 7497       | (4369, 12863)  | 0.2536             | 0.0550   | 74%  | 7438       | (4562, 12127)  | 0.2078             | 0.0442   | 65%    | 18.4%                      |
|          | FDA007P | 6680       | (4167, 10709)  | 0.1909             | 0.0563   | 64%  | 6526       | (4930, 8641)   | 0.0580             | 0.0650   | 42%    | 50.2%                      |
|          | S17     | 85         | (17, 433)      | 2.3958             | 0.0618   | 380% | 77         | (17, 354)      | 2.0825             | 0.1192   | 341%   | 10.4%                      |
| S18      | 151     | (79, 285)  | 0.2419         | 0.1166             | 82%      | 141  | (110, 179) | 0.0124         | 0.1278             | 45%      | 60.9%  |                            |
| S19      | 174     | (99, 306)  | 0.2630         | 0.0930             | 82%      | 183  | (161, 208) | 0.0000         | 0.0642             | 29%      | 82.0%  |                            |
| S20      | 79      | (17, 375)  | 2.2032         | 0.0569             | 350%     | 74   | (17, 333)  | 2.0173         | 0.0905             | 327%     | 6.7%   |                            |

Pn, pneumococcal serotype; CI, confidence interval; CV, coefficient of variation (expressed as a percent); Lab, variability among the laboratories; Run(Lab), variability among the runs within each laboratory.

**Supplementary Table S2 (continued). The effect of normalization on individual samples.** The overall reduction in variability due to normalization is shown for each test sample. Estimates of various variance components and CVs from the ANOVA are also shown. Outliers are included in these analyses.

| Serotype | Sample  | Unadjusted |                |                    |          |      | Normalized |                |                    |          |        | Reduction In Variation (%) |
|----------|---------|------------|----------------|--------------------|----------|------|------------|----------------|--------------------|----------|--------|----------------------------|
|          |         | Estimate   | 95% CI         | Variance Estimates |          | %CV  | Estimate   | 95% CI         | Variance Estimates |          | %CV    |                            |
|          |         |            |                | Lab                | Run(Lab) |      |            |                | Lab                | Run(Lab) |        |                            |
| Pn7F     | FDA007A | 7211       | (2851, 18233)  | 0.7729             | 0.0432   | 147% | 7066       | (4403, 11341)  | 0.1940             | 0.0444   | 63%    | 70.8%                      |
|          | FDA007B | 7978       | (3104, 20498)  | 0.7942             | 0.0727   | 154% | 8157       | (5438, 12236)  | 0.1359             | 0.0641   | 56%    | 76.9%                      |
|          | FDA007C | 8464       | (4475, 16012)  | 0.3553             | 0.0684   | 92%  | 8422       | (7384, 9606)   | 0.0000             | 0.0759   | 32%    | 82.1%                      |
|          | FDA007D | 21335      | (12351, 36853) | 0.2365             | 0.1738   | 90%  | 22290      | (17233, 28834) | 0.0217             | 0.1856   | 58%    | 49.5%                      |
|          | FDA007E | 8781       | (3612, 21348)  | 0.7053             | 0.0561   | 139% | 9105       | (6890, 12033)  | 0.0557             | 0.0716   | 43%    | 83.3%                      |
|          | FDA007F | 2698       | (1148, 6340)   | 0.6501             | 0.0628   | 133% | 2555       | (1877, 3478)   | 0.0623             | 0.1160   | 53%    | 75.0%                      |
|          | FDA007G | 10318      | (3936, 27043)  | 0.8363             | 0.0345   | 154% | 10171      | (6628, 15609)  | 0.1500             | 0.0792   | 61%    | 73.7%                      |
|          | FDA007H | 2634       | (1289, 5384)   | 0.4545             | 0.0473   | 103% | 2550       | (2123, 3062)   | 0.0122             | 0.0878   | 37%    | 80.1%                      |
|          | FDA007I | 3877       | (1553, 9676)   | 0.7429             | 0.0841   | 148% | 3757       | (2758, 5117)   | 0.0602             | 0.1277   | 54%    | 77.3%                      |
|          | FDA007J | 2056       | (823, 5137)    | 0.7410             | 0.1040   | 151% | 1942       | (1347, 2800)   | 0.0988             | 0.1096   | 58%    | 75.3%                      |
|          | FDA007K | 904        | (422, 1939)    | 0.5149             | 0.0655   | 114% | 917        | (699, 1204)    | 0.0515             | 0.0744   | 43%    | 78.3%                      |
|          | FDA007L | 2619       | (1276, 5374)   | 0.4459             | 0.1173   | 112% | 2570       | (2088, 3163)   | 0.0189             | 0.0976   | 41%    | 79.3%                      |
|          | FDA007M | 5594       | (2429, 12883)  | 0.6162             | 0.0713   | 129% | 5450       | (4137, 7179)   | 0.0498             | 0.0842   | 44%    | 80.5%                      |
|          | FDA007N | 6884       | (3164, 14980)  | 0.5274             | 0.1077   | 122% | 6947       | (4811, 10030)  | 0.0960             | 0.1277   | 60%    | 64.8%                      |
|          | FDA007O | 3952       | (1747, 8937)   | 0.5761             | 0.1430   | 133% | 3947       | (2798, 5567)   | 0.0934             | 0.0675   | 49%    | 77.6%                      |
|          | FDA007P | 2418       | (1104, 5295)   | 0.5324             | 0.1267   | 125% | 2384       | (1862, 3053)   | 0.0317             | 0.1143   | 47%    | 77.8%                      |
|          | S21     | 72         | (23, 222)      | 1.1310             | 0.1384   | 209% | 63         | (27, 148)      | 0.5805             | 0.3474   | 162%   | 26.9%                      |
| S22      | 68      | (18, 259)  | 1.5883         | 0.1496             | 274%     | 60   | (23, 155)  | 0.7544         | 0.2911             | 178%     | 39.8%  |                            |
| S23      | 130     | (67, 255)  | 0.3892         | 0.0911             | 100%     | 126  | (86, 184)  | 0.1066         | 0.1270             | 62%      | 51.4%  |                            |
| S24      | 75      | (25, 221)  | 1.0220         | 0.2172             | 204%     | 72   | (35, 145)  | 0.3858         | 0.3129             | 131%     | 43.6%  |                            |
| Pn9V     | FDA007A | 8502       | (5465, 13227)  | 0.1508             | 0.1327   | 70%  | 7771       | (5943, 10163)  | 0.0534             | 0.0576   | 40%    | 60.9%                      |
|          | FDA007B | 2753       | (1382, 5486)   | 0.4030             | 0.1420   | 109% | 2495       | (1653, 3765)   | 0.1429             | 0.0525   | 56%    | 64.1%                      |
|          | FDA007C | 1161       | (658, 2048)    | 0.2718             | 0.1039   | 85%  | 1010       | (639, 1595)    | 0.1728             | 0.0817   | 66%    | 32.2%                      |
|          | FDA007D | 9509       | (5713, 15826)  | 0.2178             | 0.0893   | 74%  | 8591       | (4927, 14980)  | 0.2620             | 0.0899   | 81%    | -12.7%                     |
|          | FDA007E | 5874       | (3593, 9603)   | 0.1829             | 0.1822   | 83%  | 5067       | (3835, 6697)   | 0.0582             | 0.0594   | 41%    | 67.8%                      |
|          | FDA007F | 966        | (687, 1358)    | 0.0802             | 0.1258   | 57%  | 836        | (639, 1094)    | 0.0501             | 0.0749   | 42%    | 39.3%                      |
|          | FDA007G | 2825       | (1819, 4388)   | 0.1606             | 0.0777   | 63%  | 2477       | (2169, 2830)   | 0.0000             | 0.0776   | 32%    | 67.4%                      |
|          | FDA007H | 882        | (473, 1642)    | 0.3217             | 0.1470   | 98%  | 777        | (528, 1142)    | 0.1048             | 0.1457   | 65%    | 46.6%                      |
|          | FDA007I | 896        | (652, 1230)    | 0.0729             | 0.0923   | 50%  | 829        | (502, 1371)    | 0.1971             | 0.1567   | 81%    | -53.3%                     |
|          | FDA007J | 2676       | (1602, 4471)   | 0.2122             | 0.1340   | 80%  | 2397       | (1829, 3141)   | 0.0398             | 0.1280   | 51%    | 51.5%                      |
|          | FDA007K | 1533       | (905, 2597)    | 0.2353             | 0.0863   | 76%  | 1477       | (947, 2302)    | 0.1606             | 0.0883   | 65%    | 22.6%                      |
|          | FDA007L | 2246       | (957, 5268)    | 0.6406             | 0.0976   | 136% | 2119       | (1115, 4024)   | 0.3571             | 0.0795   | 94%    | 40.9%                      |
|          | FDA007M | 1268       | (841, 1913)    | 0.1387             | 0.0727   | 58%  | 1195       | (958, 1492)    | 0.0336             | 0.0523   | 34%    | 59.4%                      |
|          | FDA007N | 18983      | (10684, 33729) | 0.2824             | 0.0878   | 84%  | 16503      | (11321, 24055) | 0.1041             | 0.1193   | 60%    | 39.6%                      |
|          | FDA007O | 1621       | (1145, 2295)   | 0.0909             | 0.0945   | 54%  | 1507       | (744, 3056)    | 0.4381             | 0.0733   | 104%   | -63.7%                     |
|          | FDA007P | 2310       | (1548, 3446)   | 0.1265             | 0.0947   | 60%  | 2154       | (1483, 3128)   | 0.1032             | 0.1111   | 59%    | 3.1%                       |
|          | S21     | 72         | (21, 243)      | 1.3008             | 0.2126   | 242% | 69         | (25, 187)      | 0.8383             | 0.3622   | 199%   | 20.7%                      |
| S22      | 7       | (3, 17)    | 0.7216         | 0.0643             | 143%     | 7    | (3, 19)    | 0.7784         | 0.1669             | 164%     | -16.9% |                            |
| S23      | 23      | (8, 69)    | 1.0325         | 0.1485             | 196%     | 22   | (8, 65)    | 0.9701         | 0.2986             | 208%     | -6.9%  |                            |
| S24      | 14      | (5, 38)    | 0.8460         | 0.3989             | 205%     | 15   | (5, 44)    | 0.9691         | 0.4252             | 226%     | -10.7% |                            |

**Pn**, pneumococcal serotype; **CI**, confidence interval; **CV**, coefficient of variation (expressed as a percent); **Lab**, variability among the laboratories; **Run(Lab)**, variability among the runs within each laboratory.

**Supplementary Table S2 (continued). The effect of normalization on individual samples.** The overall reduction in variability due to normalization is shown for each test sample. Estimates of various variance components and CVs from the ANOVA are also shown. Outliers are included in these analyses.

| Serotype | Sample  | Unadjusted |               |                    |          |       | Normalized |               |                    |          |       | Reduction In Variation (%) |
|----------|---------|------------|---------------|--------------------|----------|-------|------------|---------------|--------------------|----------|-------|----------------------------|
|          |         | Estimate   | 95% CI        | Variance Estimates |          | %CV   | Estimate   | 95% CI        | Variance Estimates |          | %CV   |                            |
|          |         |            |               | Lab                | Run(Lab) |       |            |               | Lab                | Run(Lab) |       |                            |
| Pn14     | FDA007A | 2326       | (1726, 3135)  | 0.0720             | 0.0443   | 41%   | 2289       | (1680, 3120)  | 0.0783             | 0.0418   | 41%   | -3.2%                      |
|          | FDA007B | 9299       | (5091, 16985) | 0.3189             | 0.0531   | 84%   | 9290       | (6915, 12480) | 0.0726             | 0.0315   | 38%   | 72.0%                      |
|          | FDA007C | 780        | (580, 1048)   | 0.0675             | 0.0595   | 43%   | 766        | (545, 1075)   | 0.0876             | 0.0784   | 50%   | -23.5%                     |
|          | FDA007D | 4369       | (2886, 6614)  | 0.1396             | 0.0829   | 60%   | 4339       | (3590, 5243)  | 0.0215             | 0.0513   | 31%   | 67.3%                      |
|          | FDA007E | 9072       | (5004, 16449) | 0.3089             | 0.0628   | 84%   | 9051       | (6450, 12699) | 0.0899             | 0.0658   | 48%   | 58.1%                      |
|          | FDA007F | 888        | (571, 1380)   | 0.1674             | 0.0459   | 59%   | 953        | (748, 1214)   | 0.0433             | 0.0472   | 35%   | 57.6%                      |
|          | FDA007G | 7439       | (3839, 14416) | 0.3815             | 0.0801   | 97%   | 7713       | (5942, 10014) | 0.0515             | 0.0498   | 37%   | 78.1%                      |
|          | FDA007H | 998        | (643, 1550)   | 0.1611             | 0.0742   | 62%   | 1041       | (737, 1472)   | 0.0966             | 0.0571   | 48%   | 34.7%                      |
|          | FDA007I | 1579       | (909, 2743)   | 0.2512             | 0.1291   | 85%   | 1567       | (1215, 2022)  | 0.0450             | 0.0667   | 40%   | 70.6%                      |
|          | FDA007J | 1276       | (838, 1944)   | 0.1434             | 0.0872   | 62%   | 1295       | (960, 1747)   | 0.0704             | 0.0528   | 42%   | 46.6%                      |
|          | FDA007K | 549        | (379, 795)    | 0.1071             | 0.0872   | 55%   | 530        | (416, 676)    | 0.0442             | 0.0435   | 34%   | 54.9%                      |
|          | FDA007L | 516        | (338, 788)    | 0.1464             | 0.0839   | 62%   | 515        | (375, 708)    | 0.0758             | 0.0746   | 47%   | 34.7%                      |
|          | FDA007M | 5489       | (3763, 8006)  | 0.1056             | 0.1187   | 61%   | 5264       | (3594, 7710)  | 0.1180             | 0.0662   | 54%   | 17.9%                      |
|          | FDA007N | 2820       | (1832, 4340)  | 0.1493             | 0.0979   | 64%   | 2789       | (2005, 3879)  | 0.0862             | 0.0588   | 46%   | 41.3%                      |
|          | FDA007O | 5663       | (3056, 10497) | 0.3374             | 0.0419   | 85%   | 5731       | (4247, 7732)  | 0.0712             | 0.0496   | 42%   | 68.2%                      |
|          | FDA007P | 3573       | (1962, 6506)  | 0.3169             | 0.0441   | 82%   | 3656       | (2814, 4751)  | 0.0514             | 0.0493   | 37%   | 72.1%                      |
|          | S17     | 146        | (82, 258)     | 0.2005             | 0.0596   | 67%   | 137        | (103, 182)    | 0.0423             | 0.0521   | 36%   | 63.7%                      |
|          | S18     | 152        | (97, 238)     | 0.1628             | 0.0941   | 66%   | 147        | (106, 205)    | 0.0789             | 0.0838   | 50%   | 36.7%                      |
|          | S19     | 210        | (132, 334)    | 0.1806             | 0.0689   | 65%   | 218        | (152, 311)    | 0.1014             | 0.0680   | 51%   | 32.1%                      |
|          | S20     | 140        | (83, 236)     | 0.2307             | 0.0833   | 75%   | 133        | (99, 179)     | 0.0689             | 0.0457   | 40%   | 63.5%                      |
| Pn18C    | FDA007A | 2358       | (938, 5929)   | 0.7302             | 0.2098   | 164%  | 2218       | (1522, 3233)  | 0.1007             | 0.1354   | 63%   | 74.9%                      |
|          | FDA007B | 186        | (50, 688)     | 1.5078             | 0.2349   | 274%  | 168        | (79, 357)     | 0.4727             | 0.1928   | 126%  | 61.8%                      |
|          | FDA007C | 3185       | (1407, 7208)  | 0.5652             | 0.2035   | 140%  | 2994       | (2012, 4454)  | 0.1228             | 0.0990   | 60%   | 71.1%                      |
|          | FDA007D | 14936      | (8446, 26413) | 0.2665             | 0.1428   | 90%   | 14662      | (7071, 30403) | 0.4677             | 0.0732   | 109%  | -24.3%                     |
|          | FDA007E | 1775       | (653, 4823)   | 0.8893             | 0.0917   | 169%  | 1646       | (1069, 2533)  | 0.1513             | 0.0844   | 62%   | 76.0%                      |
|          | FDA007F | 454        | (153, 1348)   | 1.0480             | 0.1288   | 196%  | 451        | (308, 658)    | 0.0982             | 0.1549   | 65%   | 78.5%                      |
|          | FDA007G | 1786       | (733, 4352)   | 0.6918             | 0.1450   | 150%  | 1828       | (1469, 2276)  | 0.0214             | 0.1067   | 43%   | 84.7%                      |
|          | FDA007H | 688        | (220, 2152)   | 1.1653             | 0.0725   | 204%  | 692        | (419, 1143)   | 0.2171             | 0.0554   | 69%   | 78.0%                      |
|          | FDA007I | 132        | (21, 837)     | 3.0494             | 0.2044   | 507%  | 110        | (19, 627)     | 2.7094             | 0.1675   | 445%  | 11.6%                      |
|          | FDA007J | 6772       | (2987, 15350) | 0.5900             | 0.0914   | 128%  | 7161       | (5433, 9438)  | 0.0537             | 0.0746   | 43%   | 81.2%                      |
|          | FDA007K | 496        | (146, 1683)   | 1.3122             | 0.2111   | 244%  | 552        | (292, 1044)   | 0.3301             | 0.1877   | 105%  | 66.0%                      |
|          | FDA007L | 321        | (104, 987)    | 1.1264             | 0.0993   | 203%  | 325        | (191, 555)    | 0.2349             | 0.1184   | 81%   | 71.2%                      |
|          | FDA007M | 647        | (45, 9196)    | 6.3558             | 0.1716   | 1187% | 506        | (41, 6244)    | 5.7087             | 0.1062   | 1015% | 10.9%                      |
|          | FDA007N | 6995       | (2874, 17026) | 0.7088             | 0.0488   | 139%  | 6889       | (5130, 9251)  | 0.0575             | 0.1032   | 49%   | 78.8%                      |
|          | FDA007O | 1954       | (853, 4474)   | 0.6041             | 0.0968   | 131%  | 2022       | (1596, 2562)  | 0.0428             | 0.0385   | 33%   | 88.4%                      |
|          | FDA007P | 670        | (251, 1786)   | 0.8624             | 0.0568   | 161%  | 732        | (538, 995)    | 0.0623             | 0.1126   | 52%   | 81.0%                      |
|          | S21     | 7          | (2, 30)       | 1.9068             | 0.0648   | 307%  | 7          | (2, 24)       | 1.5225             | 0.0631   | 252%  | 19.6%                      |
|          | S22     | 16         | (5, 46)       | 0.9886             | 0.2185   | 200%  | 13         | (5, 39)       | 0.9492             | 0.2541   | 200%  | 0.3%                       |
|          | S23     | 10         | (4, 29)       | 0.9478             | 0.1336   | 183%  | 9          | (3, 24)       | 0.8587             | 0.0556   | 160%  | 15.4%                      |
|          | S24     | 29         | (11, 80)      | 0.8678             | 0.1963   | 181%  | 23         | (9, 59)       | 0.7186             | 0.2485   | 167%  | 9.1%                       |

Pn, pneumococcal serotype; CI, confidence interval; CV, coefficient of variation (expressed as a percent); Lab, variability among the laboratories; Run(Lab), variability among the runs within each laboratory.

**Supplementary Table S2 (continued). The effect of normalization on individual samples.** The overall reduction in variability due to normalization is shown for each test sample. Estimates of various variance components and CVs from the ANOVA are also shown. Outliers are included in these analyses.

| Serotype | Sample  | Unadjusted |               |                    |          |      | Normalized |              |                    |          |        | Reduction In Variation (%) |
|----------|---------|------------|---------------|--------------------|----------|------|------------|--------------|--------------------|----------|--------|----------------------------|
|          |         | Estimate   | 95% CI        | Variance Estimates |          | %CV  | Estimate   | 95% CI       | Variance Estimates |          | %CV    |                            |
|          |         |            |               | Lab                | Run(Lab) |      |            |              | Lab                | Run(Lab) |        |                            |
| Pn19A    | FDA007A | 1318       | (385, 4505)   | 0.9595             | 0.1033   | 180% | 1252       | (771, 2032)  | 0.1416             | 0.0527   | 55%    | 81.7%                      |
|          | FDA007B | 726        | (210, 2513)   | 0.9761             | 0.1155   | 184% | 693        | (433, 1108)  | 0.1327             | 0.0508   | 53%    | 83.2%                      |
|          | FDA007C | 841        | (331, 2132)   | 0.5540             | 0.0388   | 116% | 771        | (616, 964)   | 0.0242             | 0.0417   | 29%    | 88.9%                      |
|          | FDA007D | 3868       | (1545, 9681)  | 0.5305             | 0.0773   | 118% | 3519       | (2063, 6002) | 0.1782             | 0.0340   | 59%    | 65.1%                      |
|          | FDA007E | 306        | (19, 5027)    | 5.0493             | 0.1563   | 879% | 249        | (26, 2374)   | 3.2156             | 0.3902   | 568%   | 30.7%                      |
|          | FDA007F | 151        | (23, 1011)    | 2.3219             | 0.0918   | 373% | 137        | (45, 418)    | 0.7679             | 0.2158   | 170%   | 59.2%                      |
|          | FDA007G | 1271       | (439, 3680)   | 0.7211             | 0.0579   | 142% | 1221       | (1115, 1336) | 0.0000             | 0.0263   | 18%    | 96.6%                      |
|          | FDA007H | 669        | (202, 2214)   | 0.9186             | 0.0512   | 168% | 638        | (473, 861)   | 0.0480             | 0.0506   | 37%    | 89.8%                      |
|          | FDA007I | 110        | (17, 713)     | 2.2314             | 0.1410   | 367% | 97         | (35, 268)    | 0.6017             | 0.3056   | 159%   | 61.8%                      |
|          | FDA007J | 993        | (260, 3790)   | 1.1483             | 0.0733   | 202% | 951        | (609, 1485)  | 0.1178             | 0.0553   | 52%    | 85.8%                      |
|          | FDA007K | 437        | (167, 1146)   | 0.5889             | 0.0670   | 125% | 410        | (275, 611)   | 0.0904             | 0.0655   | 48%    | 76.2%                      |
|          | FDA007L | 561        | (192, 1638)   | 0.7297             | 0.0770   | 146% | 546        | (410, 728)   | 0.0400             | 0.0679   | 39%    | 86.6%                      |
|          | FDA007M | 1674       | (627, 4472)   | 0.6106             | 0.0794   | 129% | 1670       | (1285, 2170) | 0.0323             | 0.0610   | 36%    | 86.5%                      |
|          | FDA007N | 1421       | (505, 4001)   | 0.6793             | 0.0776   | 139% | 1388       | (783, 2460)  | 0.1995             | 0.0651   | 67%    | 65.0%                      |
|          | FDA007O | 2177       | (522, 9076)   | 1.3045             | 0.0883   | 225% | 2171       | (1161, 4058) | 0.2368             | 0.0857   | 76%    | 76.8%                      |
|          | FDA007P | 1529       | (493, 4748)   | 0.8229             | 0.0474   | 154% | 1525       | (1147, 2026) | 0.0437             | 0.0439   | 34%    | 89.9%                      |
|          | S17     | 57         | (8, 406)      | 2.5112             | 0.0172   | 390% | 40         | (8, 203)     | 1.6890             | 0.0510   | 274%   | 31.2%                      |
| S18      | 90      | (25, 320)  | 1.0205        | 0.1317             | 193%     | 77   | (53, 114)  | 0.0230       | 0.3636             | 86%      | 66.4%  |                            |
| S19      | 88      | (31, 250)  | 0.6933        | 0.0317             | 134%     | 81   | (71, 91)   | 0.0000       | 0.0509             | 25%      | 93.0%  |                            |
| S20      | 50      | (7, 360)   | 2.5305        | 0.0449             | 398%     | 36   | (7, 175)   | 1.6230       | 0.0347             | 262%     | 35.6%  |                            |
| Pn19F    | FDA007A | 1968       | (939, 4126)   | 0.4720             | 0.1176   | 116% | 1910       | (1146, 3181) | 0.2160             | 0.0893   | 74%    | 48.2%                      |
|          | FDA007B | 681        | (238, 1953)   | 0.9721             | 0.1732   | 192% | 632        | (286, 1396)  | 0.5353             | 0.1648   | 131%   | 38.9%                      |
|          | FDA007C | 583        | (182, 1872)   | 1.2098             | 0.0755   | 211% | 613        | (308, 1220)  | 0.4037             | 0.0823   | 101%   | 62.2%                      |
|          | FDA007D | 2750       | (1682, 4494)  | 0.1994             | 0.0954   | 72%  | 2671       | (2034, 3506) | 0.0468             | 0.0935   | 45%    | 52.4%                      |
|          | FDA007E | 5245       | (2709, 10154) | 0.3747             | 0.1077   | 100% | 5157       | (3137, 8479) | 0.2038             | 0.0990   | 73%    | 37.2%                      |
|          | FDA007F | 132        | (34, 507)     | 1.5898             | 0.2583   | 289% | 120        | (36, 396)    | 1.2246             | 0.3367   | 249%   | 15.5%                      |
|          | FDA007G | 2292       | (1290, 4071)  | 0.2906             | 0.0450   | 78%  | 2260       | (1631, 3133) | 0.0858             | 0.0523   | 45%    | 58.8%                      |
|          | FDA007H | 622        | (250, 1548)   | 0.7376             | 0.0801   | 147% | 616        | (352, 1077)  | 0.2689             | 0.0717   | 79%    | 58.4%                      |
|          | FDA007I | 626        | (266, 1474)   | 0.6447             | 0.1082   | 138% | 604        | (339, 1076)  | 0.2867             | 0.0748   | 82%    | 52.0%                      |
|          | FDA007J | 1008       | (462, 2203)   | 0.5398             | 0.0749   | 119% | 950        | (573, 1576)  | 0.2190             | 0.0652   | 70%    | 53.8%                      |
|          | FDA007K | 234        | (88, 618)     | 0.8433             | 0.0797   | 161% | 230        | (127, 417)   | 0.3086             | 0.0584   | 83%    | 60.2%                      |
|          | FDA007L | 186        | (59, 584)     | 1.1699             | 0.0824   | 206% | 186        | (89, 391)    | 0.4746             | 0.1201   | 116%   | 52.5%                      |
|          | FDA007M | 1497       | (939, 2388)   | 0.1805             | 0.0865   | 68%  | 1445       | (1217, 1716) | 0.0000             | 0.1296   | 43%    | 51.4%                      |
|          | FDA007N | 2830       | (1788, 4481)  | 0.1776             | 0.0705   | 65%  | 2669       | (1937, 3677) | 0.0763             | 0.0818   | 49%    | 36.3%                      |
|          | FDA007O | 522        | (234, 1161)   | 0.5570             | 0.1062   | 126% | 522        | (283, 961)   | 0.3190             | 0.0814   | 88%    | 39.6%                      |
|          | FDA007P | 894        | (471, 1699)   | 0.3585             | 0.0791   | 94%  | 902        | (670, 1215)  | 0.0613             | 0.0919   | 48%    | 65.0%                      |
|          | S21     | 7          | (3, 15)       | 0.5377             | 0.0746   | 119% | 6          | (3, 12)      | 0.3549             | 0.1188   | 99%    | 22.6%                      |
| S22      | 6       | (2, 14)    | 0.7559        | 0.0732             | 149%     | 6    | (2, 15)    | 0.8105       | 0.1134             | 161%     | -10.3% |                            |
| S23      | 26      | (10, 71)   | 0.8922        | 0.0296             | 161%     | 24   | (9, 66)    | 0.8841       | 0.0502             | 163%     | -1.3%  |                            |
| S24      | 5       | (3, 8)     | 0.1528        | 0.1241             | 69%      | 5    | (3, 8)     | 0.1825       | 0.1376             | 76%      | -13.5% |                            |

**Pn**, pneumococcal serotype; **CI**, confidence interval; **CV**, coefficient of variation (expressed as a percent); **Lab**, variability among the laboratories; **Run(Lab)**, variability among the runs within each laboratory.

**Supplementary Table S2 (continued). The effect of normalization on individual samples.** The overall reduction in variability due to normalization is shown for each test sample. Estimates of various variance components and CVs from the ANOVA are also shown. Outliers are included in these analyses.

| Serotype | Sample  | Unadjusted |               |                    |          |       | Normalized |              |                    |          |       | Reduction In Variation (%) |
|----------|---------|------------|---------------|--------------------|----------|-------|------------|--------------|--------------------|----------|-------|----------------------------|
|          |         | Estimate   | 95% CI        | Variance Estimates |          | %CV   | Estimate   | 95% CI       | Variance Estimates |          | %CV   |                            |
|          |         |            |               | Lab                | Run(Lab) |       |            |              | Lab                | Run(Lab) |       |                            |
| Pn23F    | FDA007A | 94         | (3, 2547)     | 7.0200             | 0.1165   | 1346% | 69         | (4, 1069)    | 4.8247             | 0.1512   | 831%  | 30.3%                      |
|          | FDA007B | 3201       | (1001, 10237) | 1.2083             | 0.0927   | 213%  | 3066       | (1971, 4768) | 0.1687             | 0.0380   | 58%   | 84.1%                      |
|          | FDA007C | 154        | (21, 1112)    | 3.5017             | 0.1086   | 569%  | 129        | (21, 778)    | 2.9284             | 0.0375   | 460%  | 17.8%                      |
|          | FDA007D | 939        | (454, 1939)   | 0.4558             | 0.1104   | 112%  | 887        | (732, 1076)  | 0.0091             | 0.1188   | 43%   | 77.4%                      |
|          | FDA007E | 3067       | (1265, 7434)  | 0.6921             | 0.0993   | 143%  | 2887       | (2361, 3531) | 0.0295             | 0.0351   | 29%   | 91.8%                      |
|          | FDA007F | 61         | (14, 262)     | 1.8947             | 0.1366   | 316%  | 70         | (16, 307)    | 1.9702             | 0.0806   | 319%  | -1.0%                      |
|          | FDA007G | 6423       | (3479, 11857) | 0.3064             | 0.1746   | 100%  | 6240       | (4667, 8343) | 0.0374             | 0.1889   | 61%   | 52.9%                      |
|          | FDA007H | 581        | (250, 1353)   | 0.6237             | 0.1175   | 137%  | 559        | (456, 685)   | 0.0199             | 0.0816   | 38%   | 86.3%                      |
|          | FDA007I | 275        | (30, 2523)    | 4.4194             | 0.1826   | 754%  | 232        | (28, 1893)   | 3.9824             | 0.1193   | 658%  | 10.9%                      |
|          | FDA007J | 1099       | (488, 2477)   | 0.5773             | 0.1043   | 128%  | 1086       | (900, 1312)  | 0.0207             | 0.0535   | 31%   | 89.1%                      |
|          | FDA007K | 989        | (566, 1728)   | 0.2649             | 0.0898   | 81%   | 1051       | (680, 1625)  | 0.1635             | 0.0407   | 57%   | 42.5%                      |
|          | FDA007L | 70         | (16, 311)     | 2.0252             | 0.0565   | 323%  | 90         | (18, 452)    | 2.3338             | 0.0659   | 371%  | -13.3%                     |
|          | FDA007M | 878        | (386, 2002)   | 0.5869             | 0.1447   | 135%  | 957        | (830, 1103)  | 0.0000             | 0.0884   | 35%   | 87.9%                      |
|          | FDA007N | 840        | (336, 2100)   | 0.7357             | 0.1381   | 155%  | 910        | (652, 1270)  | 0.0881             | 0.0614   | 47%   | 82.9%                      |
|          | FDA007O | 206        | (20, 2066)    | 4.8032             | 0.1409   | 824%  | 179        | (23, 1375)   | 3.7563             | 0.1025   | 613%  | 22.0%                      |
|          | FDA007P | 1529       | (693, 3374)   | 0.5468             | 0.1086   | 125%  | 1627       | (1398, 1894) | 0.0046             | 0.0785   | 33%   | 87.3%                      |
|          | S21     | 4          | (4, 4)        | 0.0000             | 0.0112   | 11%   | 4          | (4, 4)       | 0.0000             | 0.0112   | 11%   | 0.0%                       |
|          | S22     | 4          | (4, 4)        | 0.0000             | 0.0112   | 11%   | 4          | (4, 4)       | 0.0000             | 0.0112   | 11%   | 0.0%                       |
| S23      | 108     | (65, 181)  | 0.2197        | 0.0940             | 75%      | 109   | (69, 172)  | 0.1617       | 0.1091             | 68%      | 13.7% |                            |
| S22      | 4       | (4, 4)     | 0.0000        | 0.0000             | 0%       | 4     | (4, 4)     | 0.0000       | 0.0000             | 0%       | NA    |                            |

**Pn**, pneumococcal serotype; **CI**, confidence interval; **CV**, coefficient of variation (expressed as a percent); **Lab**, variability among the laboratories; **Run(Lab)**, variability among the runs within each laboratory.

**Supplementary Table S3. Effect of normalization on intra-laboratory variability.** The reduction in variability within a laboratory due to normalization is shown. Estimates of various variance components and CVs from the ANOVA are also shown. Outliers are included in these analyses.

| Serotype | Lab | Unadjusted         |            |     | Normalized         |        |     | Reduction in Variability (%) |
|----------|-----|--------------------|------------|-----|--------------------|--------|-----|------------------------------|
|          |     | Variance Estimates |            | %CV | Variance Estimates |        | %CV |                              |
|          |     | Run                | SamplexRun |     |                    | Run    |     | SamplexRun                   |
| Pn1      | A   | 0.0010             | 0.0480     | 25% | 0.0244             | 0.0556 | 33% | -39%                         |
|          | B   | 0.0310             | 0.1052     | 45% | 0.0000             | 0.1104 | 39% | 19%                          |
|          | C   | 0.0084             | 0.0381     | 24% | 0.0298             | 0.0441 | 31% | -37%                         |
|          | D   | 0.0122             | 0.0717     | 34% | 0.0283             | 0.0548 | 33% | 1%                           |
|          | E   | 0.0010             | 0.0674     | 30% | 0.0305             | 0.0753 | 38% | -35%                         |
|          | F   | 0.0080             | 0.0480     | 27% | 0.0077             | 0.0455 | 26% | 5%                           |
| Pn3      | A   | 0.0603             | 0.0640     | 42% | 0.0166             | 0.0670 | 34% | 33%                          |
|          | B   | 0.0096             | 0.1415     | 47% | 0.0315             | 0.1681 | 56% | -24%                         |
|          | C   | 0.0144             | 0.0400     | 26% | 0.0108             | 0.0378 | 25% | 11%                          |
|          | D   | 0.0047             | 0.0562     | 28% | 0.0084             | 0.0304 | 22% | 36%                          |
|          | E   | 0.0133             | 0.0605     | 31% | 0.0264             | 0.0648 | 35% | -19%                         |
|          | F   | 0.0159             | 0.0478     | 29% | 0.0144             | 0.0716 | 34% | -26%                         |
| Pn4      | A   | 0.0315             | 0.1273     | 49% | 0.0092             | 0.0937 | 38% | 35%                          |
|          | B   | 0.0120             | 0.0430     | 26% | 0.0136             | 0.0763 | 35% | -39%                         |
|          | C   | 0.0349             | 0.0329     | 30% | 0.0073             | 0.0486 | 27% | 18%                          |
|          | D   | 0.0125             | 0.0500     | 28% | 0.0080             | 0.0627 | 30% | -12%                         |
|          | E   | 0.0052             | 0.0544     | 28% | 0.0550             | 0.0490 | 38% | -43%                         |
|          | F   | 0.0334             | 0.0723     | 38% | 0.0000             | 0.0765 | 32% | 28%                          |
| Pn5      | A   | 0.0005             | 0.0458     | 24% | 0.0067             | 0.0462 | 26% | -12%                         |
|          | B   | 0.0195             | 0.0547     | 31% | 0.0099             | 0.1102 | 41% | -38%                         |
|          | C   | 0.0081             | 0.0239     | 20% | 0.0045             | 0.0290 | 20% | -4%                          |
|          | D   | 0.0121             | 0.0367     | 25% | 0.0140             | 0.0351 | 25% | -1%                          |
|          | E   | 0.0043             | 0.1091     | 40% | 0.0466             | 0.1188 | 50% | -31%                         |
|          | F   | 0.0106             | 0.0255     | 21% | 0.0021             | 0.0229 | 17% | 31%                          |
| Pn6A     | A   | 0.0076             | 0.1377     | 46% | 0.0071             | 0.0640 | 31% | 51%                          |
|          | B   | 0.0420             | 0.1331     | 52% | 0.0000             | 0.2253 | 61% | -22%                         |
|          | C   | 0.0074             | 0.0193     | 18% | 0.0103             | 0.0312 | 23% | -36%                         |
|          | D   | 0.0809             | 0.0862     | 50% | 0.0068             | 0.0707 | 32% | 54%                          |
|          | E   | 0.0118             | 0.0964     | 39% | 0.0555             | 0.0909 | 47% | -26%                         |
|          | F   | 0.0320             | 0.0681     | 37% | 0.0128             | 0.0717 | 34% | 16%                          |
| Pn6B     | A   | 0.0164             | 0.1053     | 42% | 0.0439             | 0.1157 | 49% | -24%                         |
|          | B   | 0.0483             | 0.0330     | 33% | 0.0076             | 0.0464 | 26% | 34%                          |
|          | C   | 0.0041             | 0.0376     | 23% | 0.0006             | 0.0356 | 21% | 13%                          |
|          | D   | 0.0301             | 0.0376     | 30% | 0.0112             | 0.0709 | 33% | -18%                         |
|          | E   | 0.0228             | 0.0550     | 32% | 0.0593             | 0.0434 | 38% | -24%                         |
|          | F   | 0.0248             | 0.0763     | 37% | 0.0511             | 0.0698 | 42% | -16%                         |
| Pn7F     | A   | 0.0057             | 0.1166     | 42% | 0.0000             | 0.1210 | 42% | 1%                           |
|          | B   | 0.0488             | 0.0957     | 46% | 0.0774             | 0.1864 | 67% | -45%                         |
|          | C   | 0.0187             | 0.0258     | 23% | 0.0006             | 0.0370 | 21% | 15%                          |
|          | D   | 0.0421             | 0.0573     | 37% | 0.0119             | 0.0346 | 24% | 53%                          |
|          | E   | 0.0000             | 0.0594     | 28% | 0.0378             | 0.0695 | 39% | -45%                         |
|          | F   | 0.0088             | 0.1149     | 42% | 0.0000             | 0.2052 | 57% | -40%                         |
| Pn9V     | A   | 0.0000             | 0.1366     | 45% | 0.0031             | 0.0955 | 37% | 28%                          |
|          | B   | 0.0532             | 0.1204     | 52% | 0.0167             | 0.3011 | 76% | -45%                         |
|          | C   | 0.0333             | 0.0384     | 31% | 0.0170             | 0.0333 | 25% | 30%                          |
|          | D   | 0.1855             | 0.0510     | 63% | 0.0211             | 0.0483 | 30% | 71%                          |
|          | E   | 0.0018             | 0.0516     | 26% | 0.1302             | 0.0434 | 52% | -69%                         |
|          | F   | 0.0341             | 0.0553     | 35% | 0.0045             | 0.0640 | 30% | 23%                          |

**Pn**, pneumococcal serotype; **CV**, coefficient of variation (expressed as a percent); **Run**, variability among the runs within a laboratory; **SamplexRun**, variability associated with the interaction between test sample and assay run.

**Supplementary Table S3 (continued). Effect of normalization on intra-laboratory variability.** The reduction in variability within a laboratory due to normalization is shown. Estimates of various variance components and CVs from the ANOVA are also shown. Outliers are included in these analyses.

| Serotype | Lab | Unadjusted         |            |     | Normalized         |            |     | Reduction in Variability (%) |
|----------|-----|--------------------|------------|-----|--------------------|------------|-----|------------------------------|
|          |     | Variance Estimates |            | %CV | Variance Estimates |            | %CV |                              |
|          |     | Run                | SamplexRun |     | Run                | SamplexRun |     |                              |
| Pn14     | A   | 0.0200             | 0.0547     | 31% | 0.0056             | 0.0498     | 27% | 26%                          |
|          | B   | 0.0014             | 0.0297     | 19% | 0.0196             | 0.0318     | 25% | -39%                         |
|          | C   | 0.0134             | 0.0250     | 22% | 0.0000             | 0.0434     | 23% | -12%                         |
|          | D   | 0.0125             | 0.0567     | 30% | 0.0048             | 0.0481     | 26% | 24%                          |
|          | E   | 0.0265             | 0.0679     | 36% | 0.0140             | 0.0774     | 35% | 3%                           |
|          | F   | 0.0977             | 0.0474     | 46% | 0.0029             | 0.0533     | 27% | 61%                          |
| Pn18C    | A   | 0.0000             | 0.0956     | 36% | 0.0005             | 0.0632     | 29% | 33%                          |
|          | B   | 0.0581             | 0.1697     | 61% | 0.0591             | 0.2214     | 70% | -19%                         |
|          | C   | 0.0111             | 0.0296     | 22% | 0.0084             | 0.0333     | 23% | -2%                          |
|          | D   | 0.1091             | 0.0722     | 53% | 0.0206             | 0.0544     | 31% | 59%                          |
|          | E   | 0.0036             | 0.1550     | 49% | 0.0474             | 0.1688     | 59% | -27%                         |
|          | F   | 0.0549             | 0.0905     | 46% | 0.0010             | 0.0800     | 33% | 44%                          |
| Pn19A    | A   | 0.0104             | 0.0646     | 31% | 0.0074             | 0.0669     | 31% | 1%                           |
|          | B   | 0.0197             | 0.0408     | 28% | 0.0000             | 0.0602     | 28% | 0%                           |
|          | C   | 0.0257             | 0.0269     | 26% | 0.0066             | 0.0269     | 20% | 36%                          |
|          | D   | 0.0233             | 0.0572     | 33% | 0.0005             | 0.0928     | 36% | -14%                         |
|          | E   | 0.0000             | 0.0000     | 0%  | 0.0000             | 0.0000     | 0%  | 0%                           |
|          | F   | 0.0618             | 0.0611     | 42% | 0.0425             | 0.2222     | 67% | -54%                         |
| Pn19F    | A   | 0.0186             | 0.0521     | 30% | 0.0023             | 0.0388     | 22% | 42%                          |
|          | B   | 0.0578             | 0.1113     | 51% | 0.0749             | 0.1651     | 63% | -30%                         |
|          | C   | 0.0094             | 0.0313     | 22% | 0.0065             | 0.0428     | 25% | -17%                         |
|          | D   | 0.0463             | 0.0580     | 38% | 0.0185             | 0.0469     | 29% | 37%                          |
|          | E   | 0.0027             | 0.1120     | 40% | 0.0272             | 0.1917     | 60% | -48%                         |
|          | F   | 0.0413             | 0.0481     | 35% | 0.0021             | 0.0511     | 26% | 41%                          |
| Pn23F    | A   | 0.0111             | 0.1070     | 41% | 0.0002             | 0.0913     | 35% | 23%                          |
|          | B   | 0.0486             | 0.0743     | 42% | 0.0319             | 0.0825     | 40% | 7%                           |
|          | C   | 0.0172             | 0.0220     | 22% | 0.0033             | 0.0179     | 16% | 46%                          |
|          | D   | 0.0614             | 0.0914     | 48% | 0.0000             | 0.0799     | 33% | 48%                          |
|          | E   | 0.0370             | 0.1286     | 50% | 0.0093             | 0.1006     | 39% | 34%                          |
|          | F   | 0.0015             | 0.0276     | 19% | 0.0007             | 0.0349     | 21% | -18%                         |

**Pn**, pneumococcal serotype; **CV**, coefficient of variation (expressed as a percent); **Run**, variability among the runs within a laboratory; **SamplexRun**, variability associated with the interaction between test sample and assay run.
